# Supplementary material for: Single-cell DNA sequencing reveals a late-dissemination model in metastatic colorectal cancer
Source: PubMed Central journal article supplement — Genome Res. 2017 Aug;27(8):1287–99. doi: 10.1101/gr.209973.116 (PMC5538546; doi:10.1101/gr.209973.116), 2017-08
Supplement: supp_gr.209973.116_Supplemental_Figures_Tables.pdf [file supp_gr.209973.116_Supplemental_Figures_Tables.pdf]

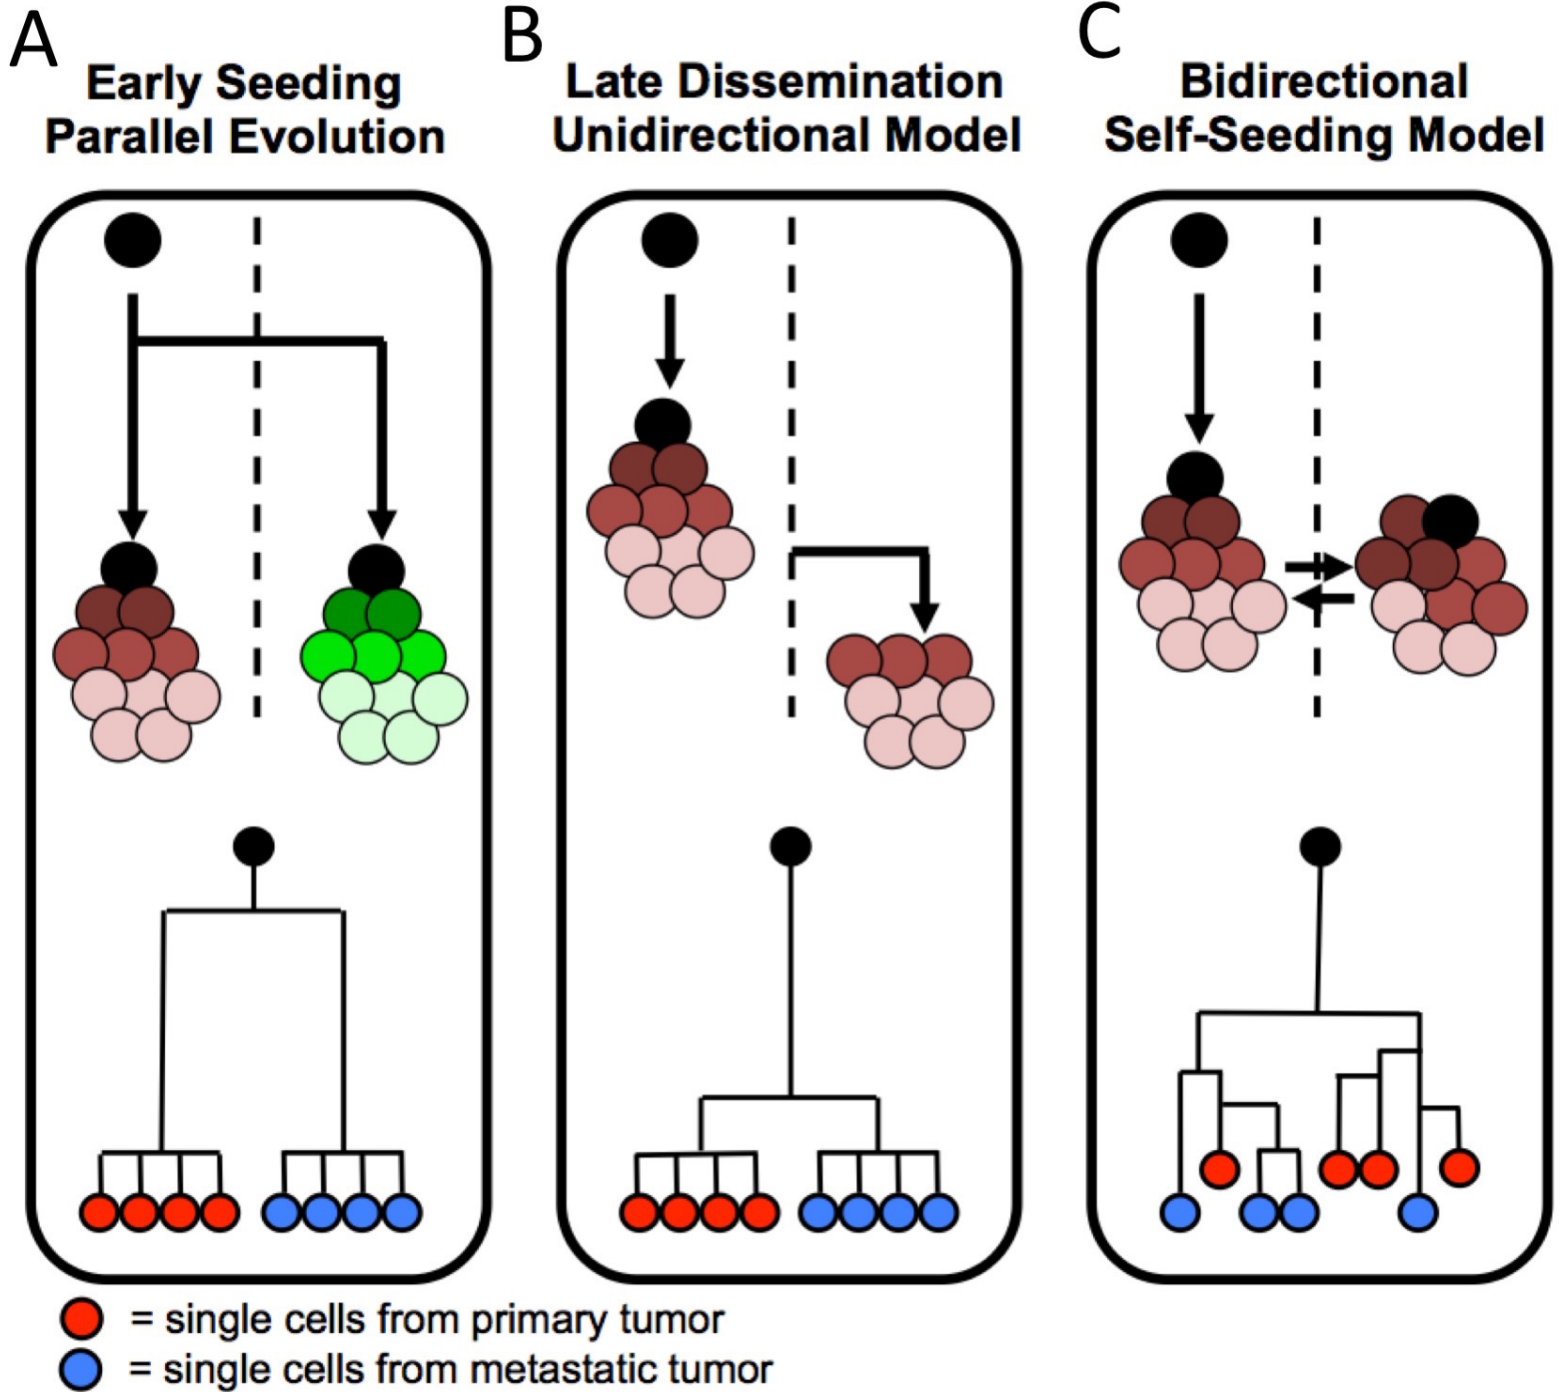

### **Supplementary Figure 1 - Models of Metastasis**

Illustrations of the general models of metastasis and corresponding phylogenetic lineages. (A) Early seeding and parallel evolution model (B) Late dissemination model (C) self-seeding model and bidirectional trafficking of tumor cells between the primary and metastatic organ sites.

**Supplementary Figure 2 -Variant Detection Filtering Criteria**

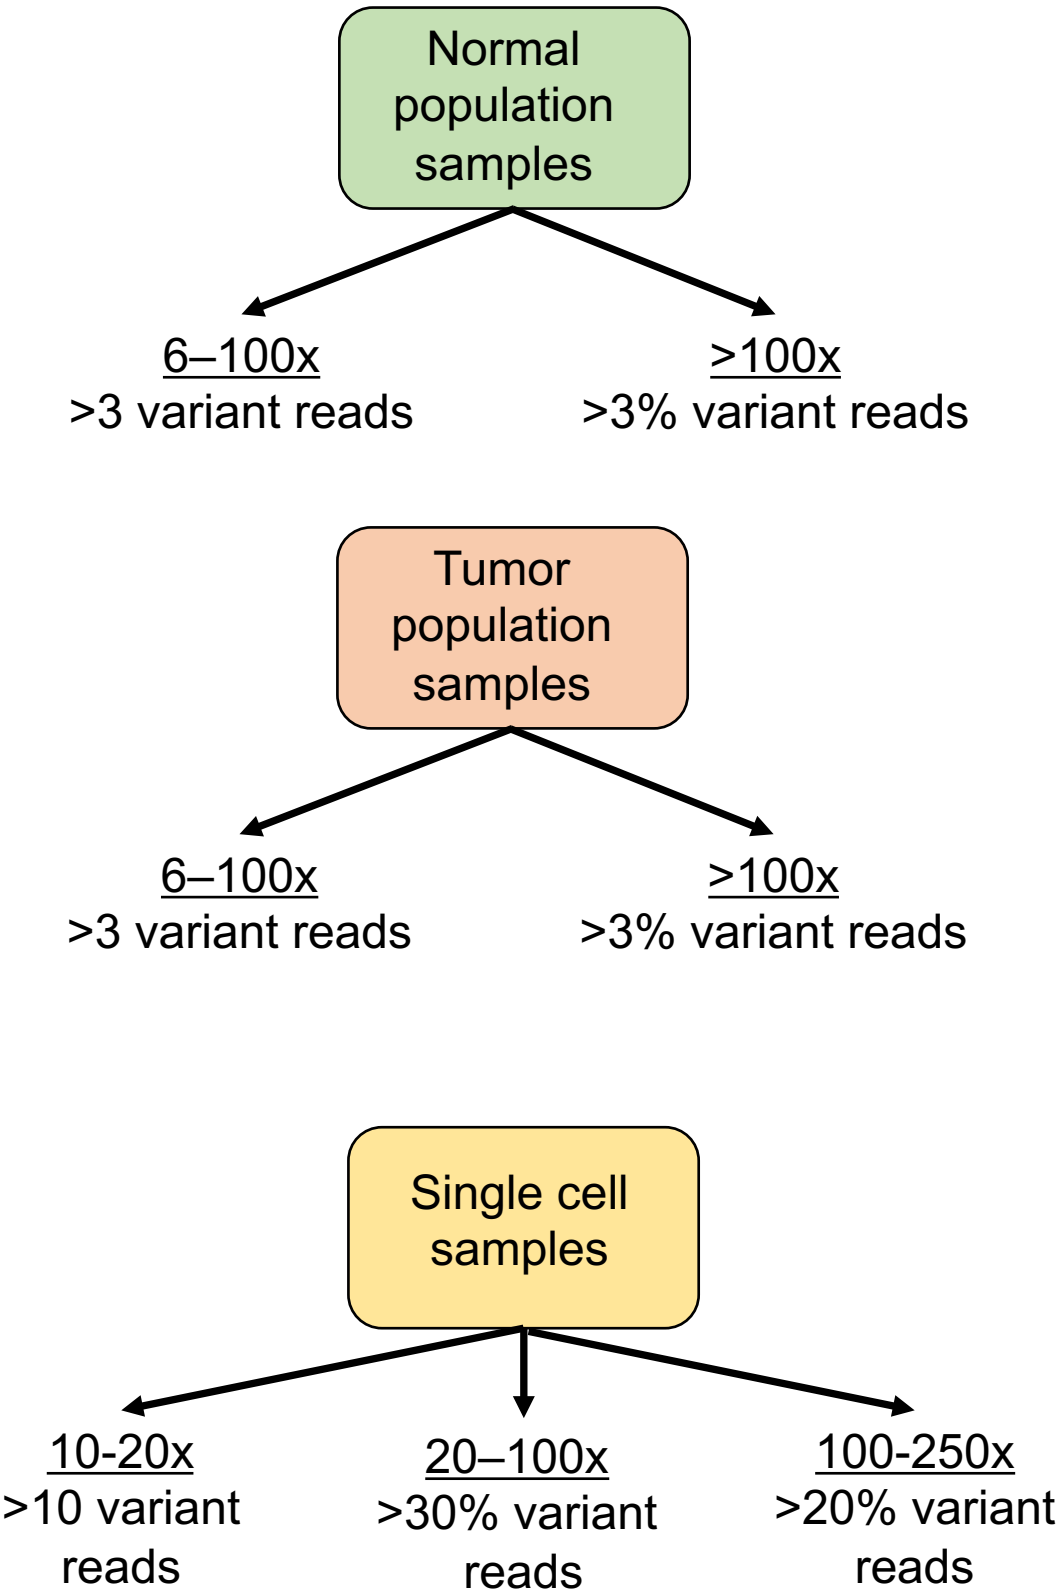

## **Supplementary Figure 2 – Variant Detection Filtering**

This flow chart shows the coverage depths and filtering criteria used for variant in the single cell sequencing and bulk sequencing data.

Supplemental Figure 3

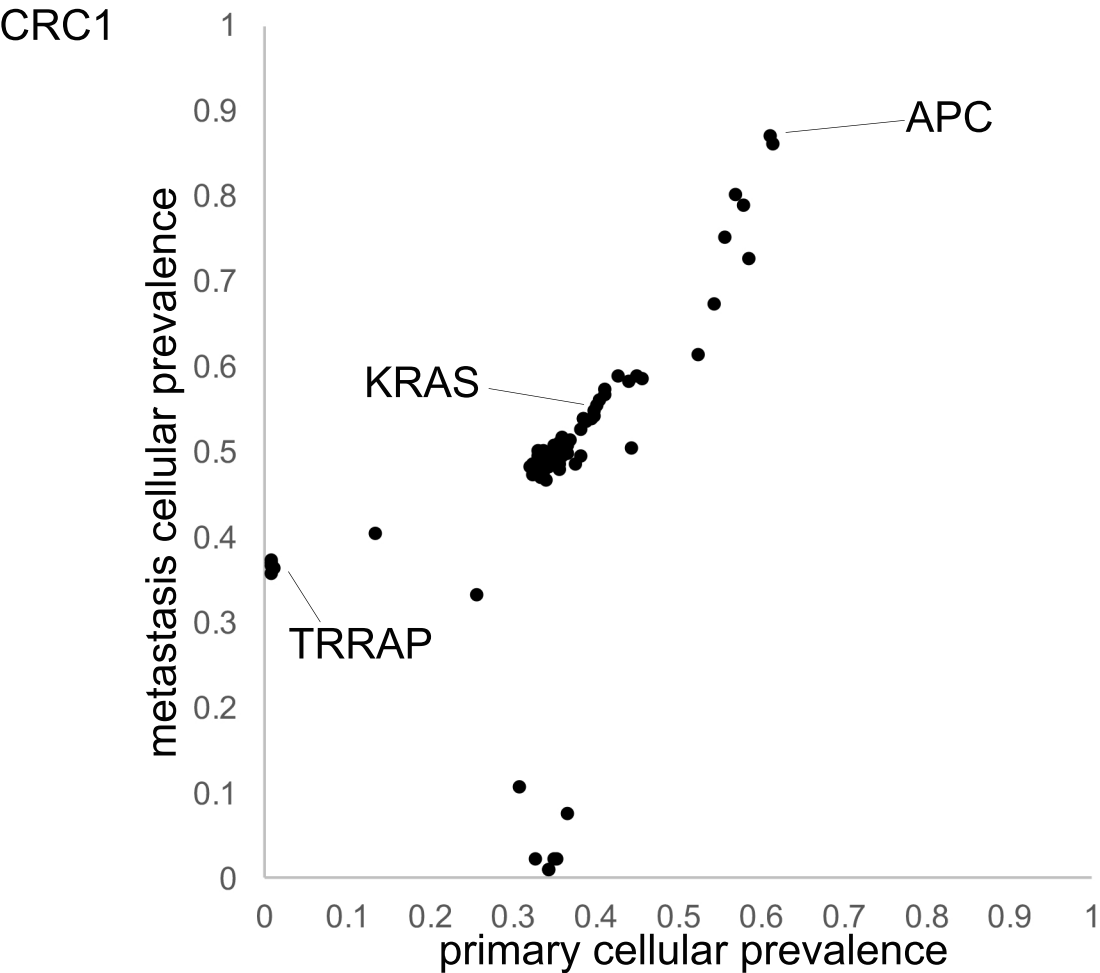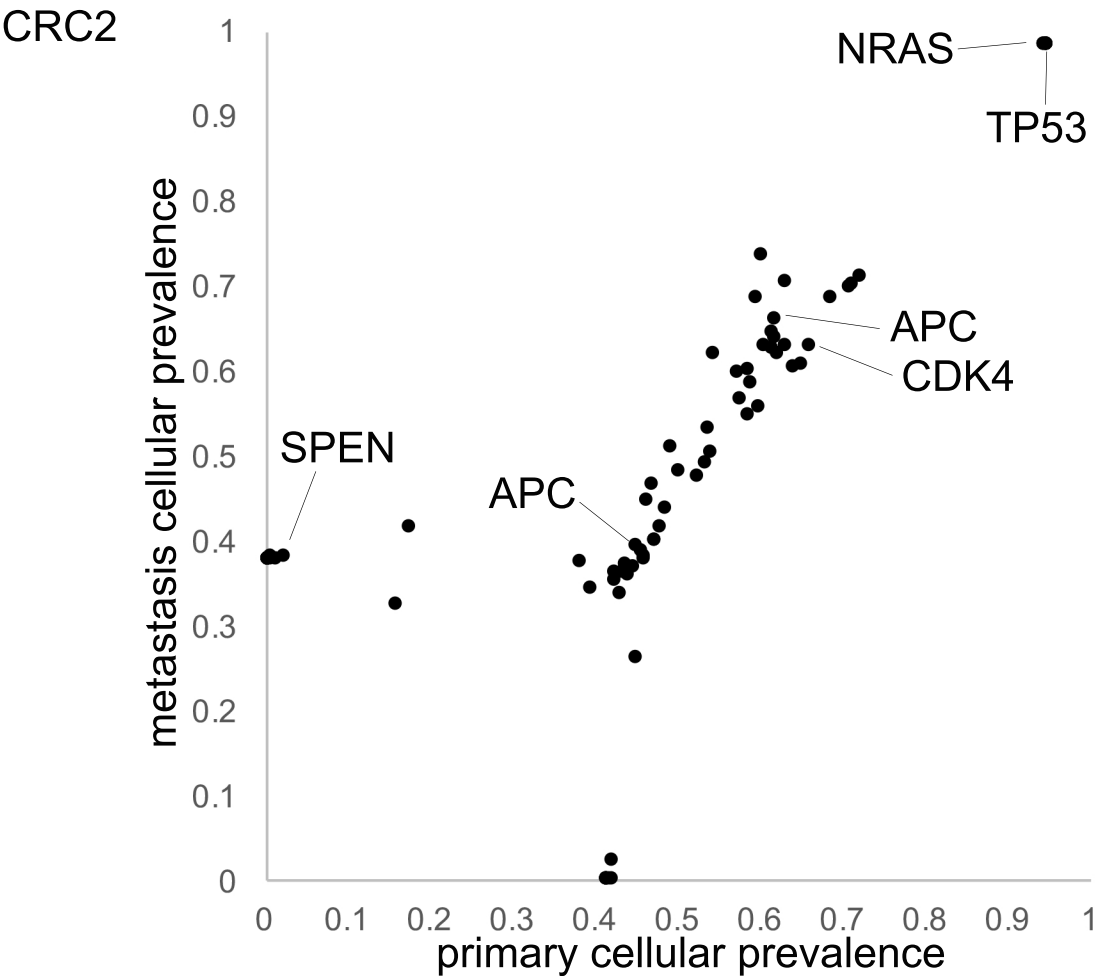

### **Supplementary Figure 3 – Copy number-adjusted Variant Allele Frequencies**

Mutations detected in both CRC1 (a) and CRC2 (b) were computed using PyClone to normalize copy number states and calculate cellular prevalence for each variant.

# Supplemental Figure 4

## CRC1

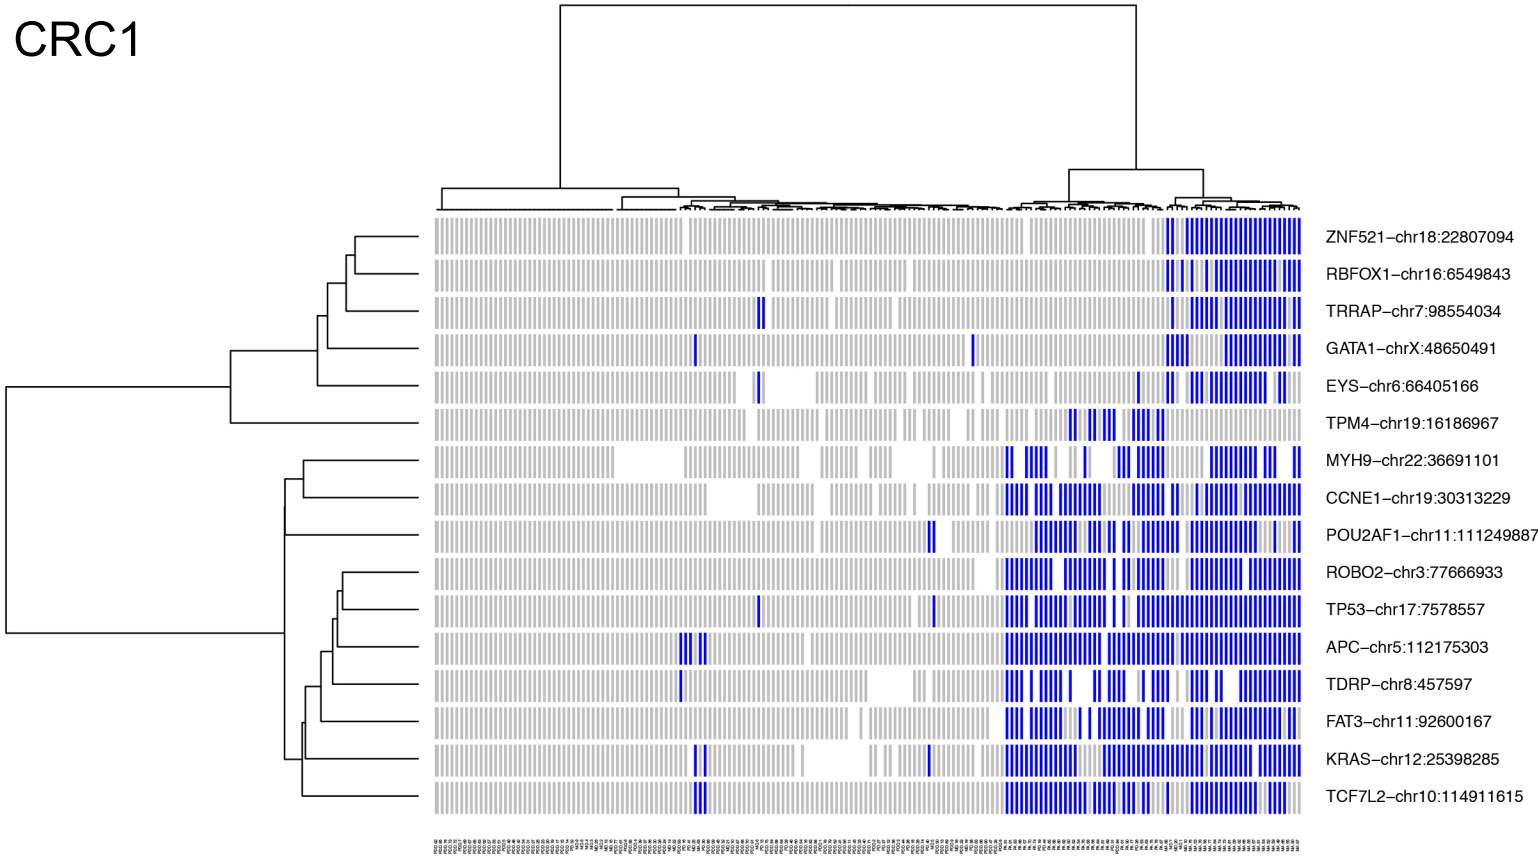

## CRC2

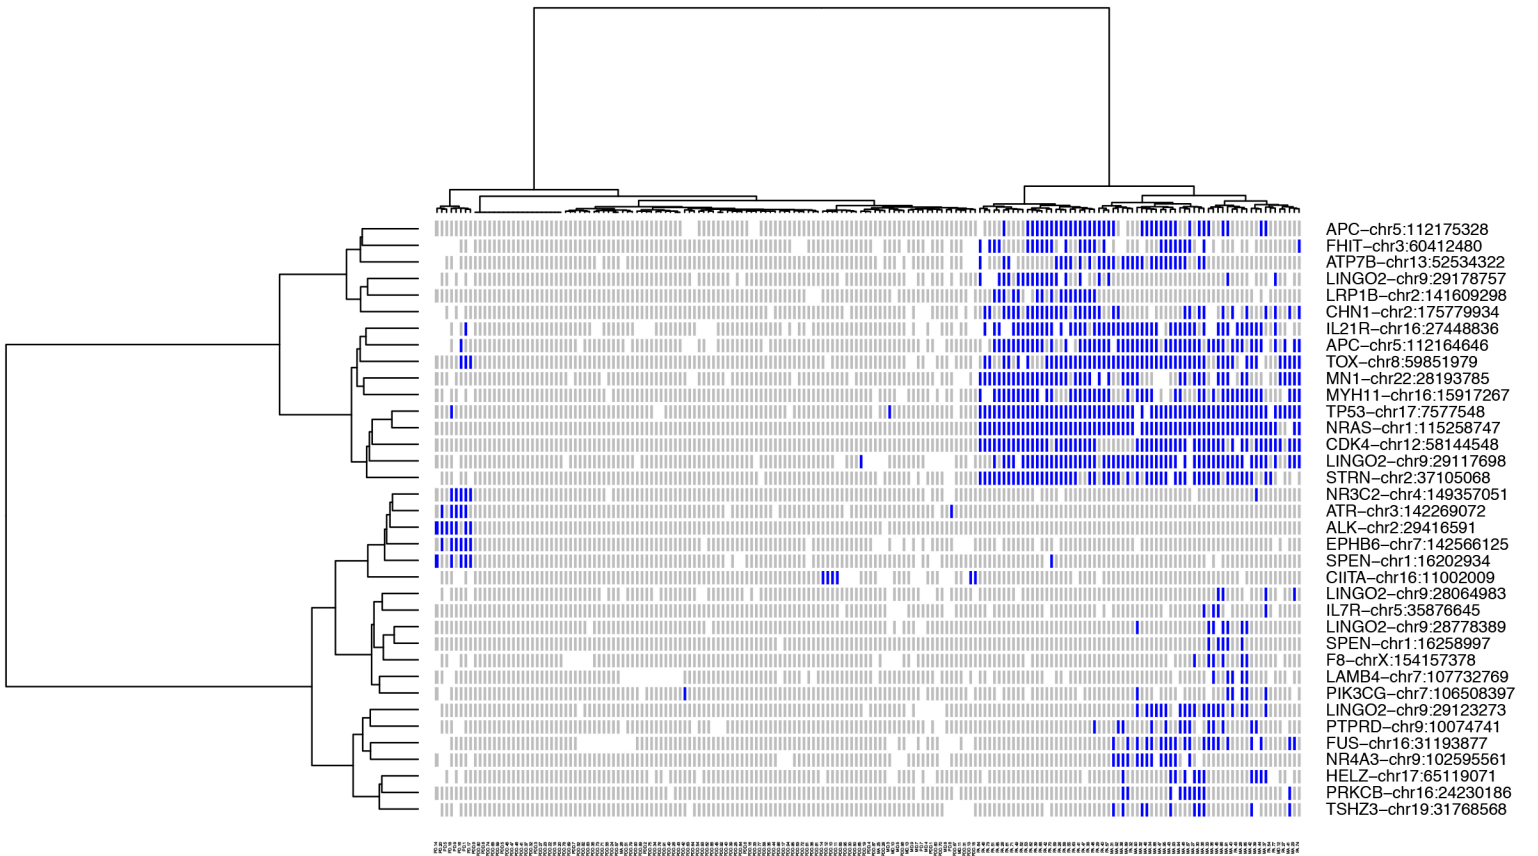

#### **Supplementary Figure 4 – Mutation Heatmaps with Dendrograms**

Hierarchical clustered mutation heatmaps for patients CO5 (a) and CO8 (b) are shown with the dendrograms on the x-axis and y-axis.

# Supplemental Figure 5

A

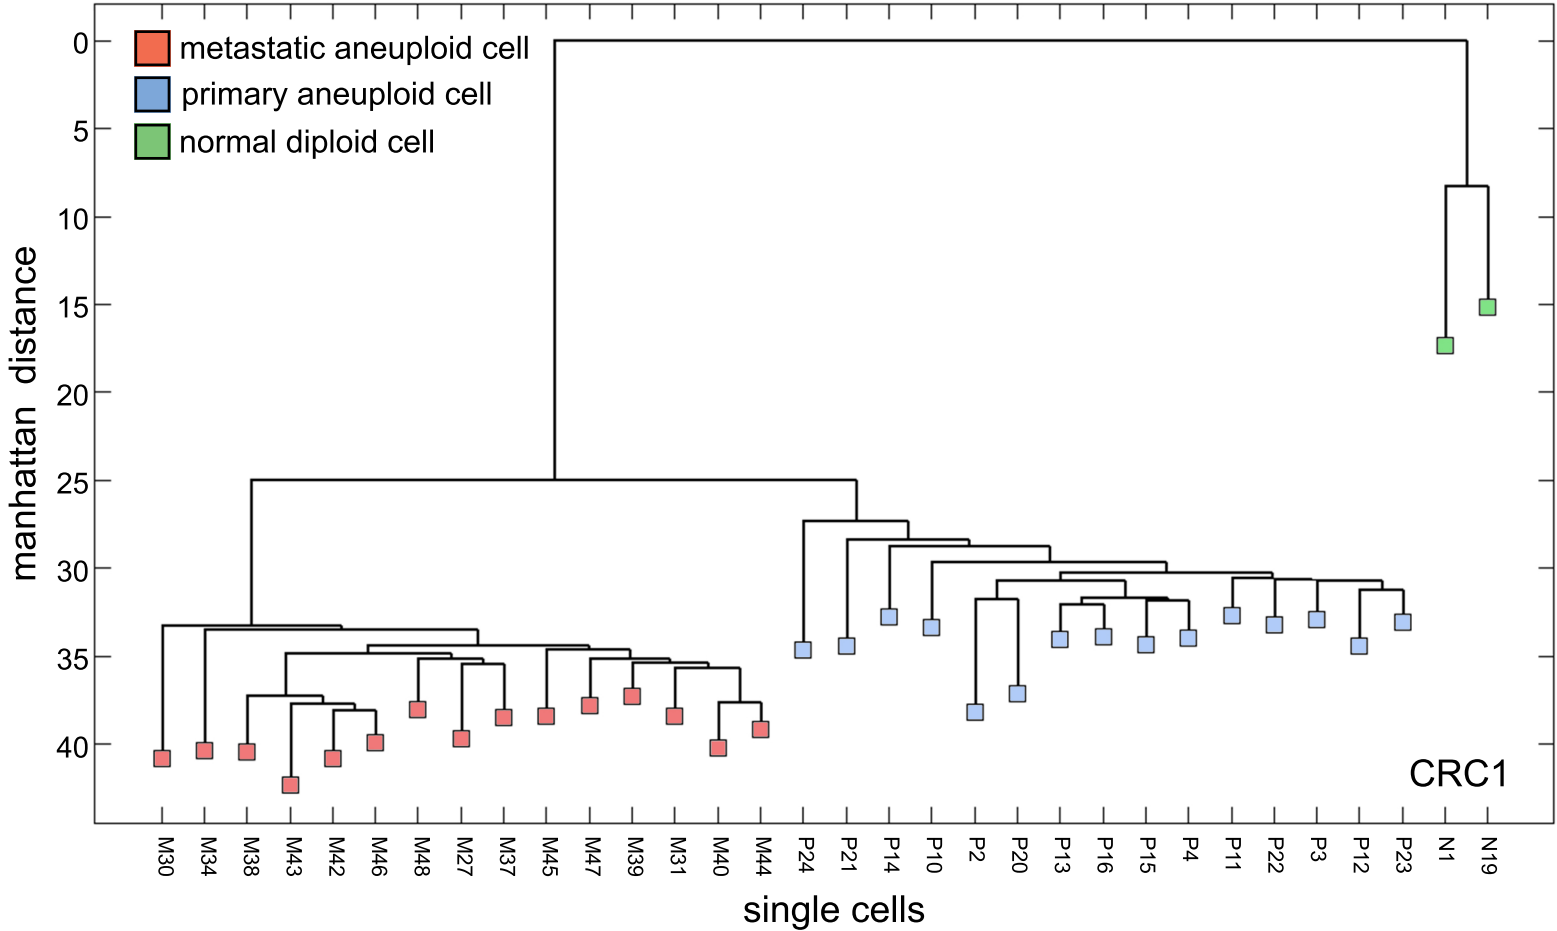

B

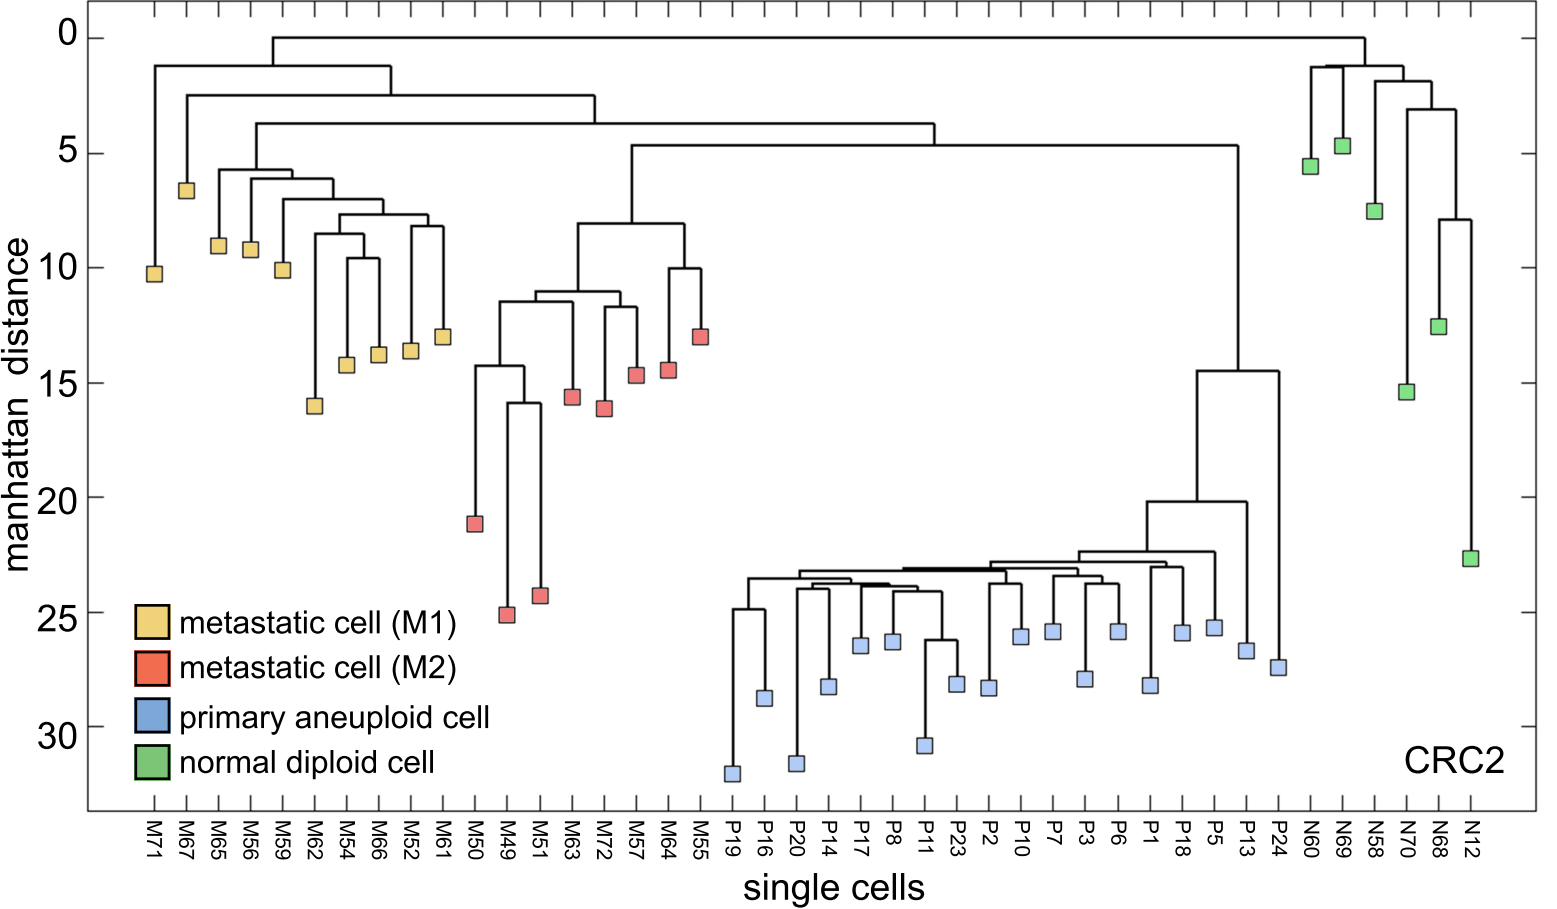

### **Supplementary Figure 5 – Balanced Minimum Evolution Copy Number Trees**

Copy number trees for patient CRC1 (a) and CRC2 (b) were constructed from single cell copy number data using the FastME balanced minimum evolution algorithm (Method).

Reads supporting bridge mutations

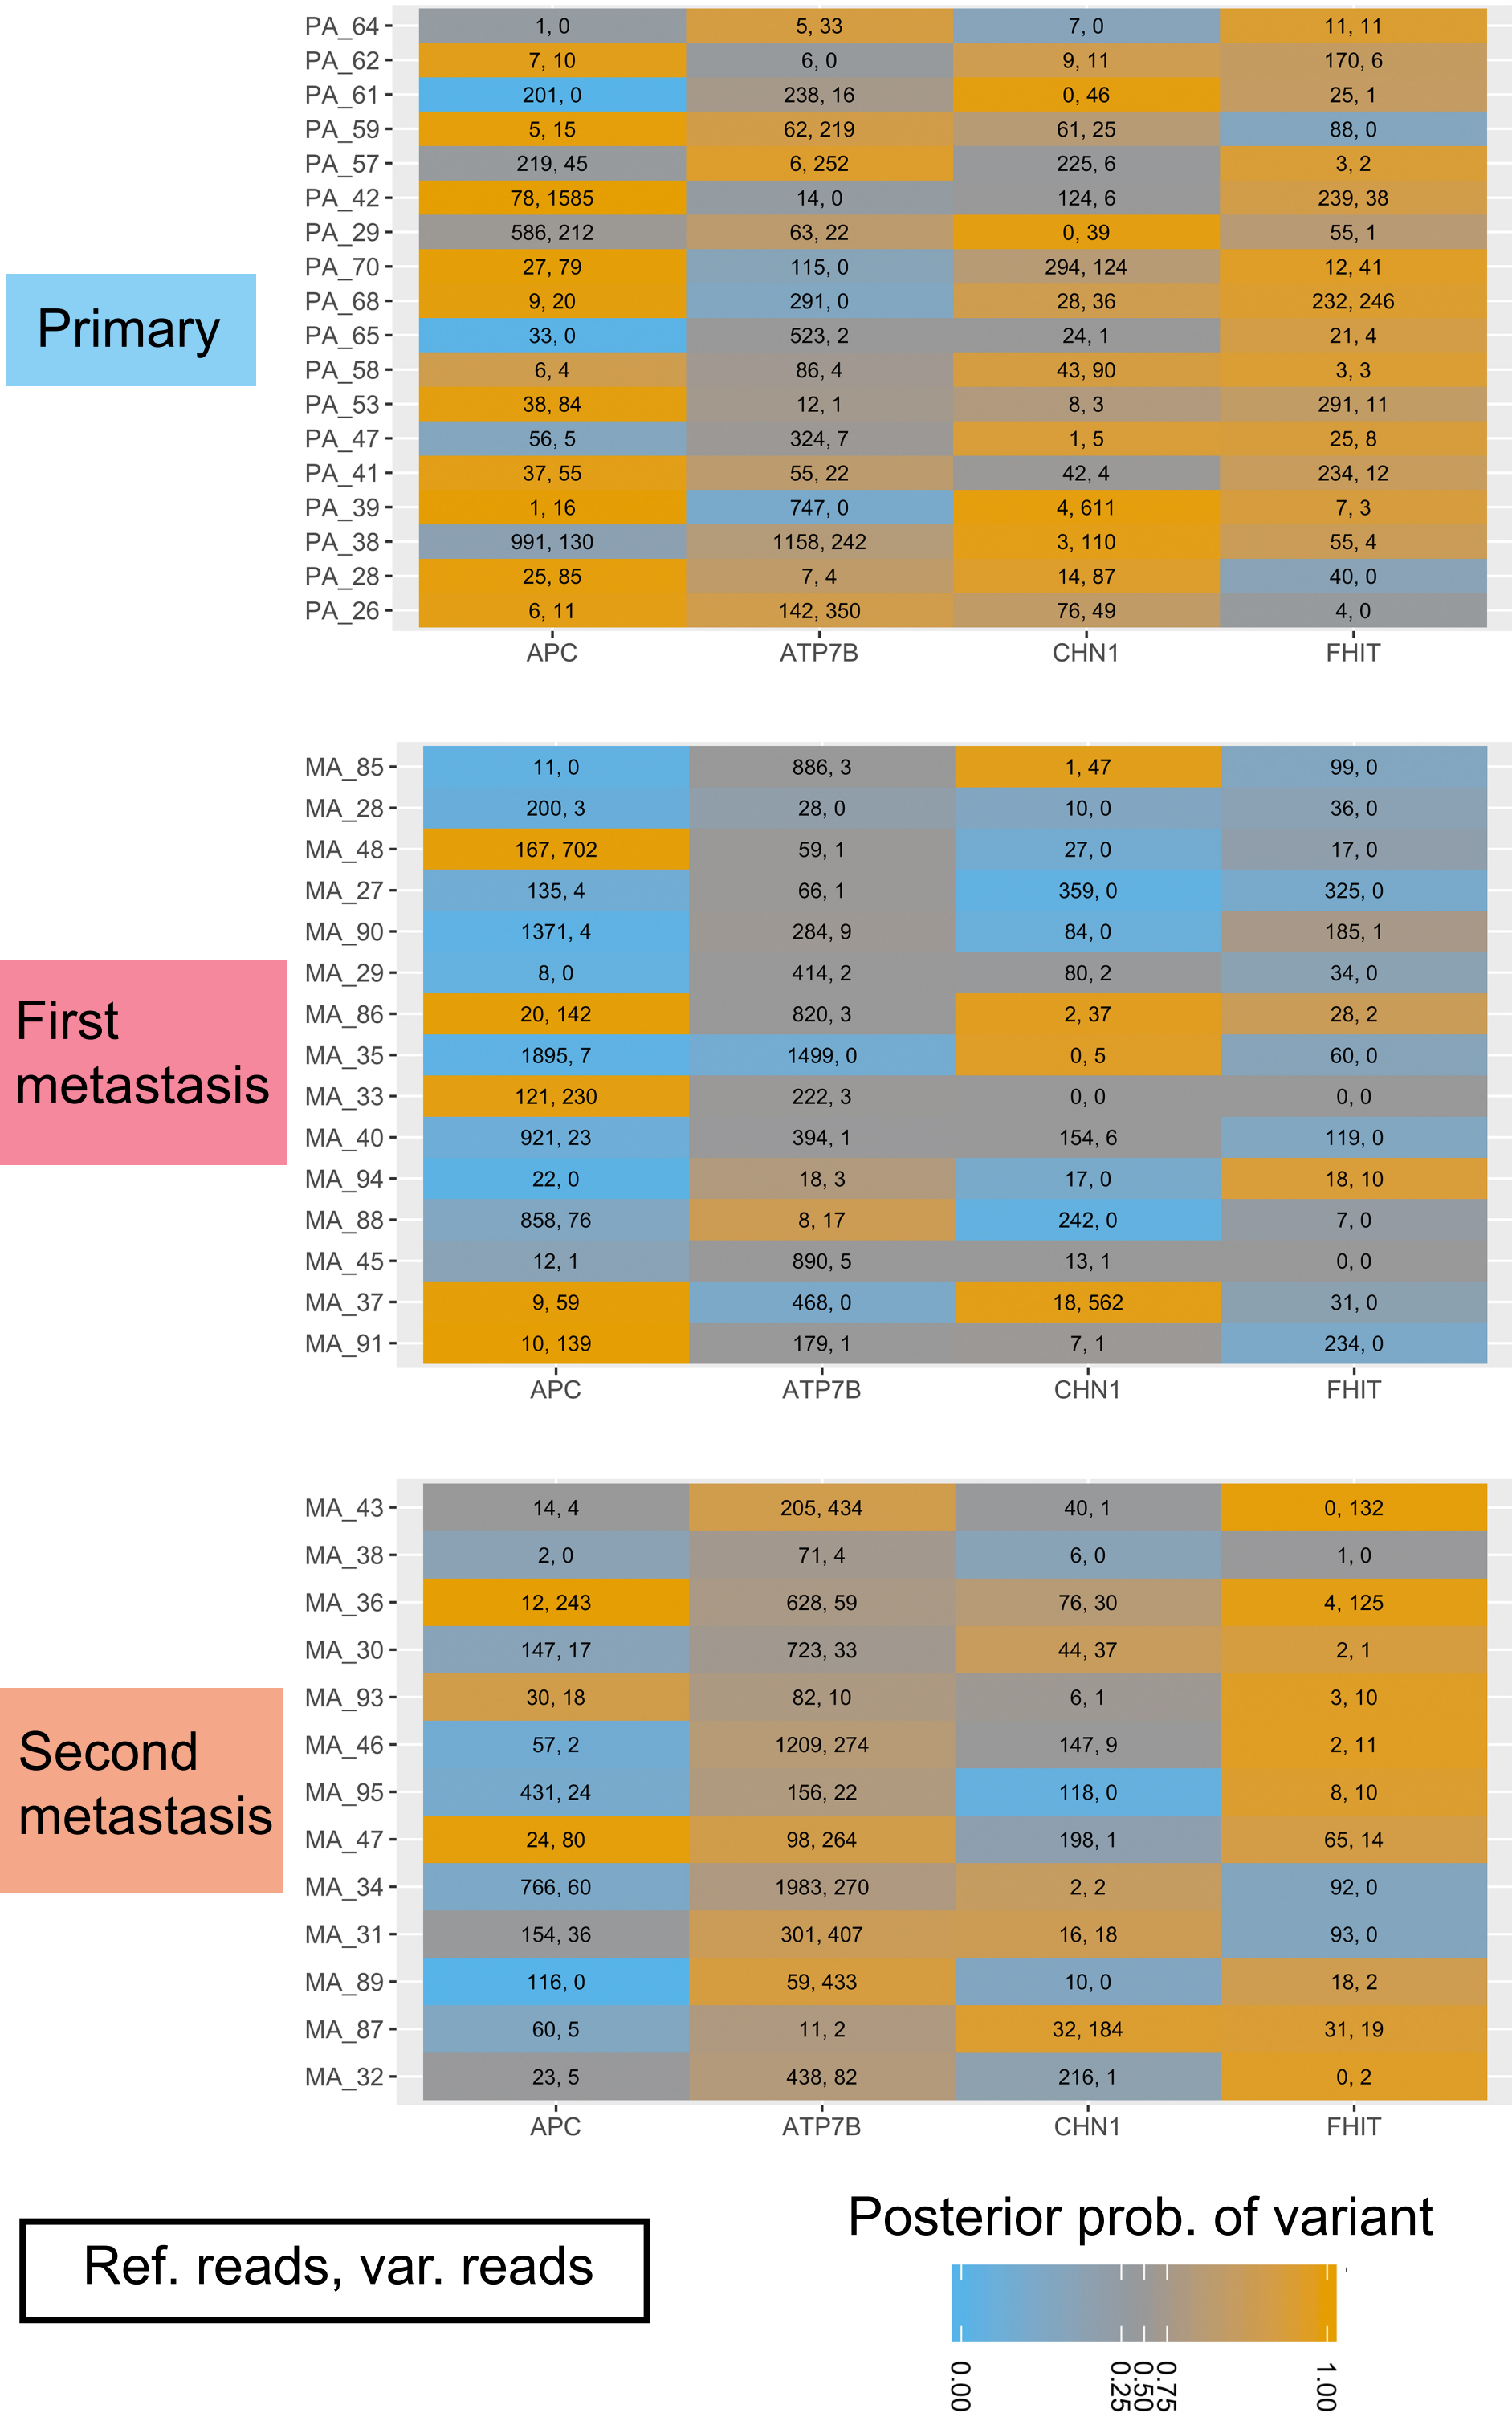

### **Supplementary Figure 6 – Probability Heatmap of Bridge Mutations in CRC2**

Heatmap of the reference and variant read counts of the four bridge mutations (*APC*, *ATP7B*, *CHN1* and *FHIT*) in patient CRC2 are listed for the primary and metastatic tumor cells. The metastatic tumor cells are shown separately for the groups defined as 'first metastasis' and 'second metastasis' by the SCITE tree. Each variant is colored in the heatmap based on the corresponding posterior probability value.

CRC1

Mutations

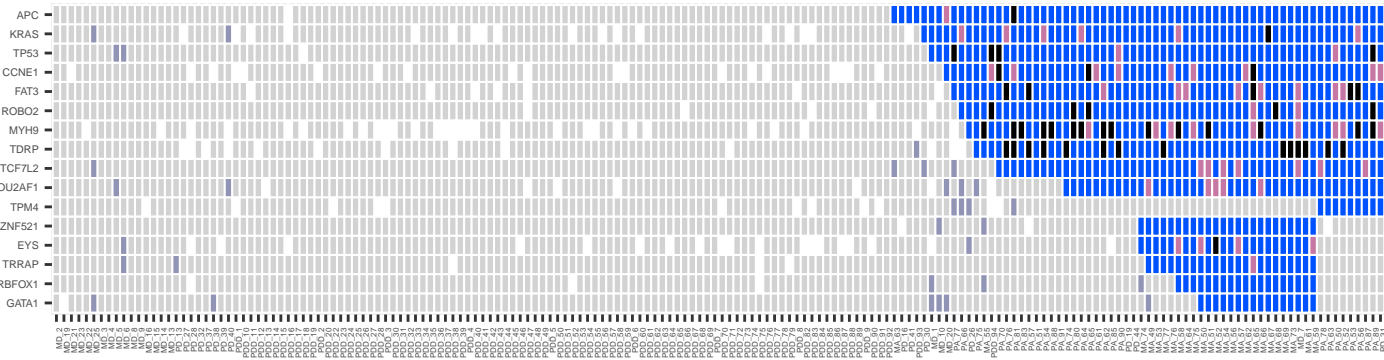

Cells

CRC2

Mutations

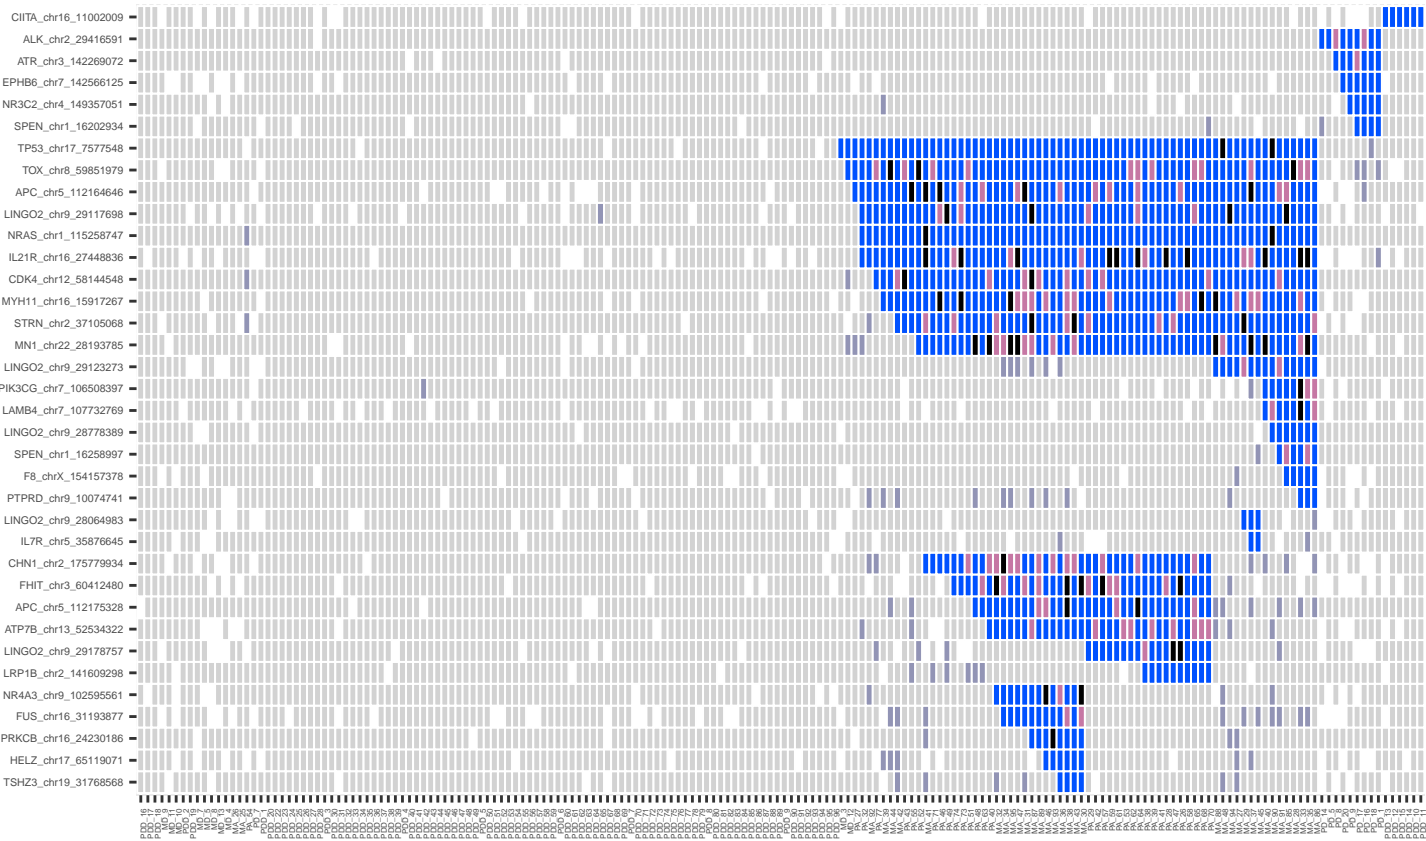

Cells

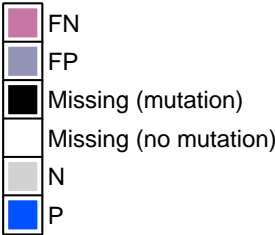

### **Supplementary Figure 7 – Genotype Matrices Calculated from SCITE Trees**

Heatmaps of genotype matrices with inferred errors based on the placement of single cells in the SCITE trees. False negative (FN) errors indicates sites in which the variant is called in the theoretical genotype but called as non-variant. False positive (FP) errors indicates a site which is non-variant in the theoretical genotype but called as variant. Missing (mutation) indicates that a site is variant in the theoretical genotype, but was excluded due to low coverage depth. This case is plotted with the same color as a false negative error, since it also represents an unobserved variant. Missing (no mutation) indicates sites that are non-variant in the theoretical genotype but excluded due to low coverage depth. Negative and positive represent concordance between the theoretical and observed genotypes in the absence and presence of a variant, respectively.

Supplemental Figure 8

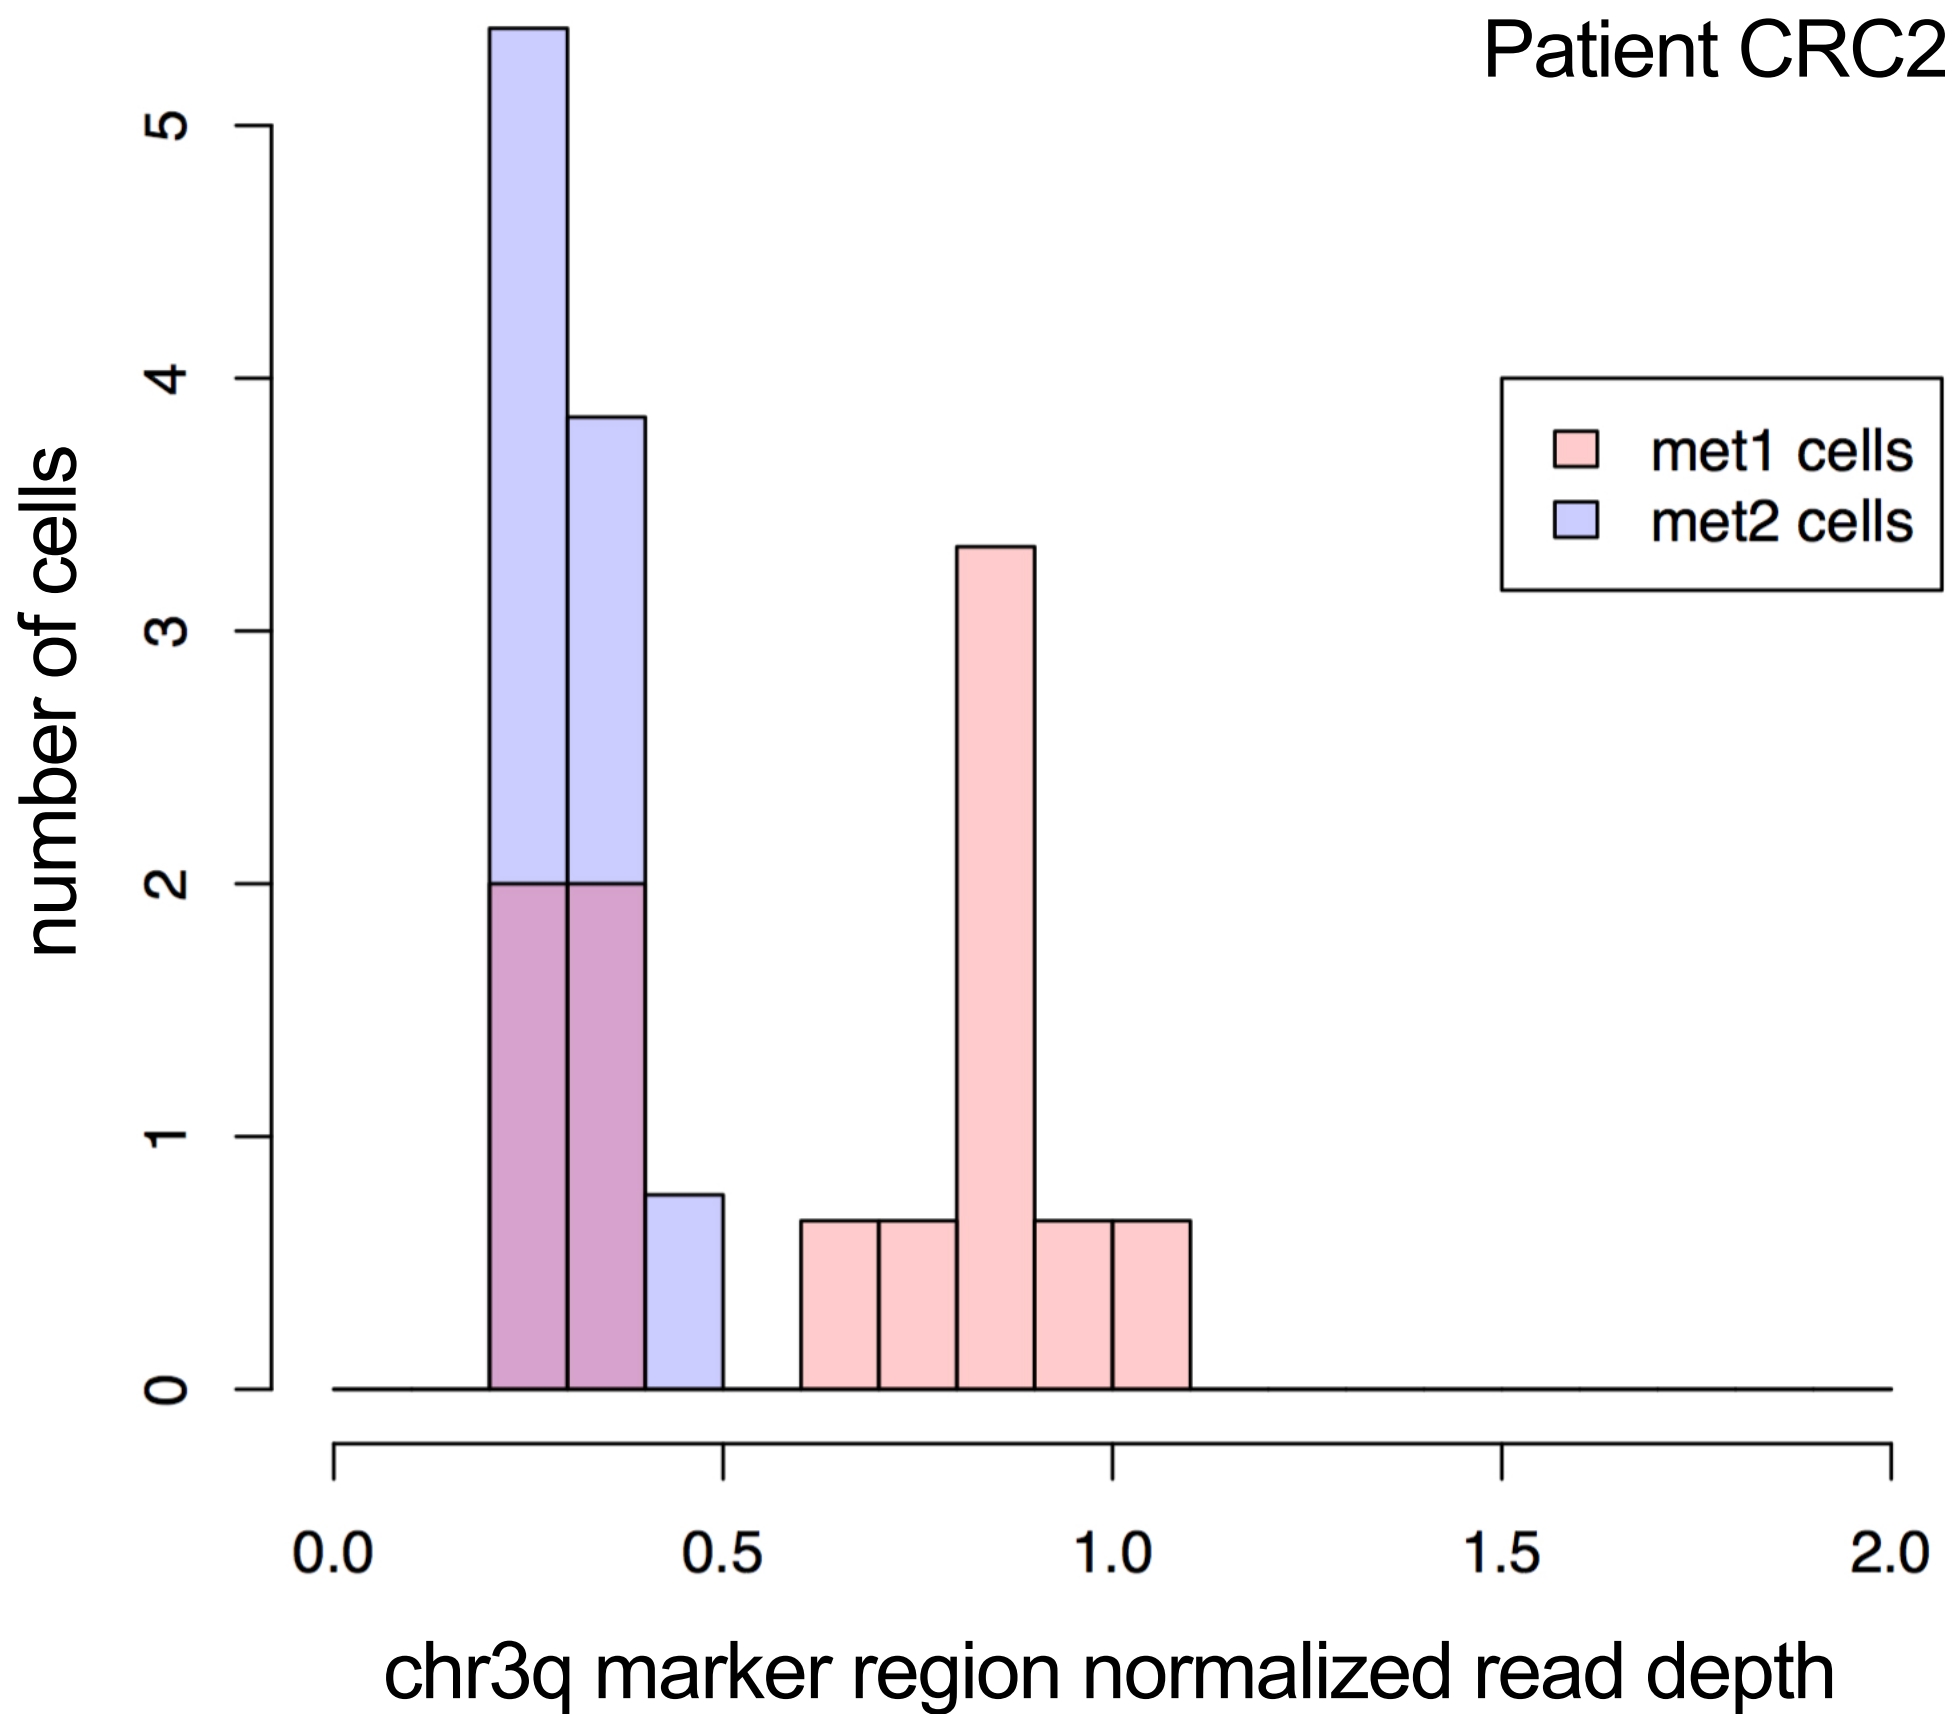

## **Supplementary Figure 8 – Copy number concordance with single cell sequencing data in CRC2**

Two copy number subpopulations were detected in the metastasis (M1 and M2) of CRC2 and two subpopulations detections by mutational profiling in the SCITE tree (first and second metastasis). However, the correspondence of the subpopulations between these data was unclear. A region of chromosome 3q was identified that serves as an effective marker for distinguishing the two subclones of the CRC2 metastasis (M1 and M2) detected using single-cell copy number profiling. To determine the amplification of 3q in the mutation data (metastasis 1 or 2), we calculated the median normalized read counts of 3q for each single cell sequenced. The 3q marker divides the mutation data into two groups, which correspond to the cells in the first and second metastasis (met1 and met2) as determined by the SCITE tree. The met1 subpopulation in the mutation data showed amplification of 3q suggesting that it corresponded to the M1 copy number subpopulation, while the met2 subpopulation corresponded to the M2 copy number subpopulation.

A

## Patient CRC1

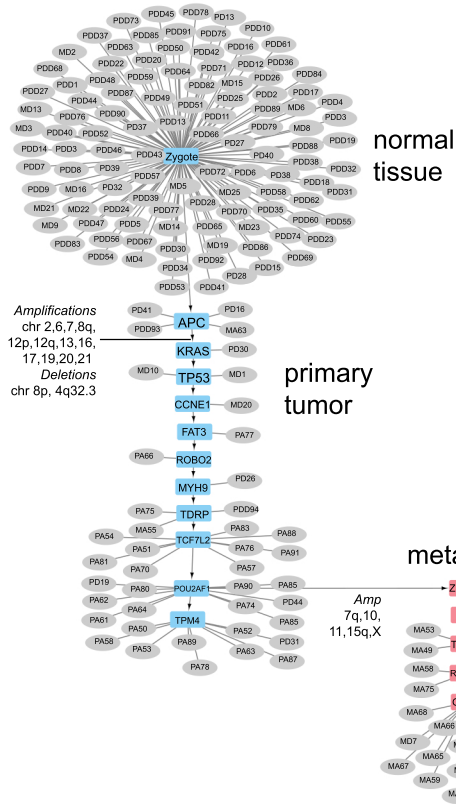

B

## Patient CRC2

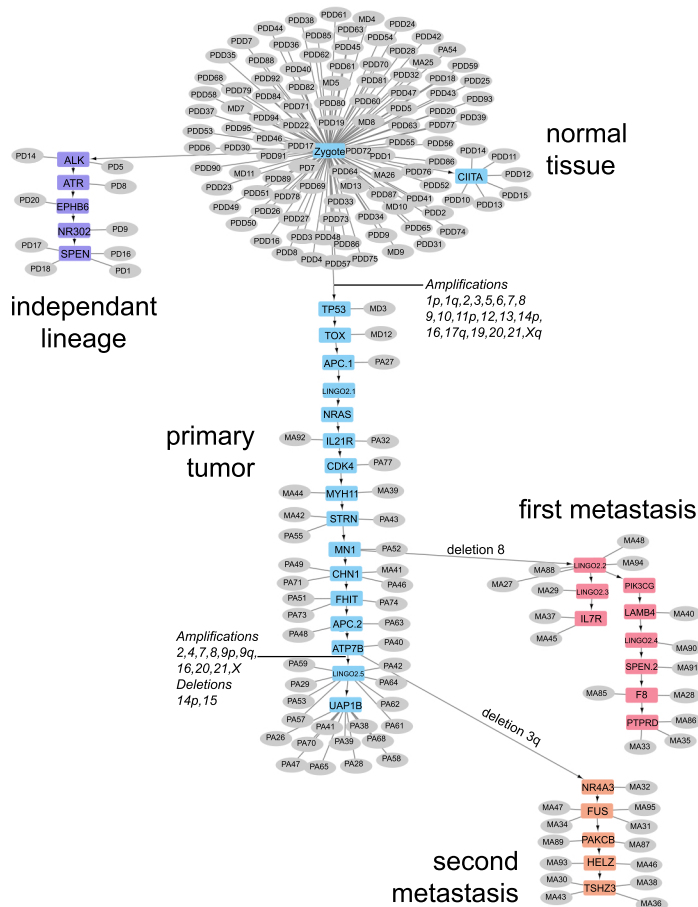

### **Supplementary Figure 9 – Integrated Mutation and Copy Number Trees**

Mutation trees were calculated from single cell data using SCITE and copy number aberrations were annotated based on the FastME results and tissue of origin. In the case of CRC2 metastasis, where two subclones coexist, the correspondence between CNV subclones and SNV subclones was determined on the basis of read depth of the SNV-genotyped cells in a genomic region (3p) that distinguishes the CNV subclones (Supp. Figure 8). *Amp* indicates amplification, while *Del* indicates a deletion.

**Supplementary Table 1**

| <b>CRC1</b>          | Depth (x) | Breadth |
|----------------------|-----------|---------|
| Normal colon         | 59        | 0.9596  |
| Normal liver         | 63        | 0.9417  |
| Primary Diploid      | 63        | 0.9684  |
| Primary Aneuploid    | 80        | 0.9819  |
| Metastatic Diploid   | 49        | 0.9744  |
| Metastatic Aneuploid | 70        | 0.9786  |
| mean                 | 64        | 0.9674  |

| <b>CRC2</b>          | Depth (x) | Breadth |
|----------------------|-----------|---------|
| Normal colon         | 111       | 0.9812  |
| Normal liver         | 83        | 0.9776  |
| Primary Diploid      | 93        | 0.9805  |
| Primary Aneuploid    | 93        | 0.98    |
| Metastatic Diploid   | 46        | 0.9756  |
| Metastatic Aneuploid | 96        | 0.9798  |
| mean                 | 87        | 0.9791  |

**Supplementary Table 1 - Coverage performance of population exome sequencing data**

This table shows the coverage depth and coverage breadth (physical coverage at sites with at least 1x depth) for each exome population sample from patients CRC1 and CRC2.

Supplementary Table 2.1 - CRC1

| Primary | Metastasis | Chrom | Position  | Gene Name | NCBI Ref Seq | Ref | Var | Mutation      | Base Change | Amino Acid | Cancer Gene | Polyphe | SIFT | mtaster | COSMIC                              |
|---------|------------|-------|-----------|-----------|--------------|-----|-----|---------------|-------------|------------|-------------|---------|------|---------|-------------------------------------|
|         |            | chr9  | 95784648  | FOD3      | NM_001083536 | G   | A   | nonsynonymous | c.G1534A    | p.E512K    | NA          | 0.352   | 0.07 | 1       | COSM1598552,COSM1598553             |
|         |            | chr10 | 131641447 | EBF3      | NM_001005463 | G   | A   | nonsynonymous | c.C1121T    | p.A374V    | NA          | 0.998   | 0.04 | 1       | COSM1204867,COSM1204868             |
|         |            | chr19 | 50214113  | CPT1C     | NM_001199752 | C   | T   | nonsynonymous | c.C1865T    | p.T622M    | NA          | 0.99    | 0.04 | 1       | NA                                  |
|         |            | chr19 | 5244392   | PTPRS     | NM_002850    | C   | T   | nonsynonymous | c.G1090A    | p.V364I    | NA          | 0.56    | 0.33 | 1       | NA                                  |
|         |            | chr15 | 42438030  | PLA2G4F   | NM_213600    | C   | T   | nonsynonymous | c.G1606A    | p.G536S    | NA          | 0.998   | 0.01 | 0.988   | NA                                  |
|         |            | chr8  | 27779273  | SCARA5    | NM_173833    | C   | T   | nonsynonymous | c.G731A     | p.R244Q    | NA          | 0.041   | 0.44 | 1       | NA                                  |
|         |            | chr16 | 511409    | RAB11FIP3 | NM_014700    | G   | T   | nonsynonymous | c.G720T     | p.K240N    | NA          | 0.982   | 0.13 | 1       | NA                                  |
|         |            | chr2  | 27552346  | GTF3C2    | NM_001035521 | G   | A   | nonsynonymous | c.C1777T    | p.R593W    | NA          | 0.99    | 0.01 | 0.999   | NA                                  |
|         |            | chr17 | 3772840   | CAMKK1    | NM_032294    | C   | T   | nonsynonymous | c.G1282A    | p.E428K    | NA          | 0.929   | 0.03 | 1       | NA                                  |
|         |            | chr7  | 75050957  | POM121C   | NM_001099415 | C   | T   | nonsynonymous | c.G2578A    | p.A880T    | NA          | 0       | 0.46 | 0.987   | NA                                  |
|         |            | chrX  | 48650491  | GATA1     | NM_002049    | C   | A   | nonsynonymous | c.C461A     | p.S154X    | GATA1       | NA      | 1    | 1       | NA                                  |
|         |            | chr9  | 116931070 | COL27A1   | NM_032888    | G   | A   | nonsynonymous | c.G1235A    | p.R412H    | NA          | 0       | 0.55 | 1       | COSM1201862                         |
|         |            | chrX  | 7811288   | VCX       | NM_013452    | C   | G   | nonsynonymous | c.C44G      | p.T15R     | NA          | 0.004   | 0.51 | 1       | NA                                  |
|         |            | chr10 | 114911615 | TCF7L2    | NM_001146274 | C   | A   | nonsynonymous | c.C1133A    | p.A378E    | TCF7L2      | 1       | 0    | 1       | NA                                  |
|         |            | chr22 | 39629598  | PDGFB     | NM_002608    | T   | C   | nonsynonymous | c.A182G     | p.D61G     | PDGFB       | 0.916   | 0.07 | 0.998   | NA                                  |
|         |            | chr19 | 2216629   | DOT1L     | NM_032482    | C   | T   | nonsynonymous | c.C2273T    | p.P758L    | DOT1L       | 0.283   | 0    | 0.963   | NA                                  |
|         |            | chr7  | 36492153  | ANLN      | NM_001284301 | G   | T   | nonsynonymous | c.G3208T    | p.V1070F   | NA          | 1       | 0.05 | 1       | NA                                  |
|         |            | chr11 | 111249887 | POU2AF1   | NM_006235    | G   | A   | nonsynonymous | c.C16T      | p.P6S      | POU2AF1     | 0       | NA   | 0.989   | NA                                  |
|         |            | chr12 | 42512910  | GXYLT1    | NM_173601    | T   | A   | nonsynonymous | c.A378T     | p.R126S    | NA          | 0.999   | 0.11 | 1       | NA                                  |
|         |            | chr15 | 41056381  | GCHFR     | NM_005258    | G   | A   | nonsynonymous | c.G3A       | p.M1I      | NA          | 0.851   | 0    | 1       | NA                                  |
|         |            | chr1  | 181686322 | CANNA1E   | NM_000721    | G   | A   | nonsynonymous | c.G1409A    | p.R470H    | NA          | 0.999   | 0.03 | 1       | COSM1247132,COSM1247131             |
|         |            | chr7  | 75050891  | POM121C   | NM_001099415 | T   | C   | nonsynonymous | c.A2644G    | p.T882A    | NA          | 0       | 0.42 | 1       | NA                                  |
|         |            | chr16 | 16103671  | ABCC1     | NM_004996    | C   | A   | nonsynonymous | c.C264A     | p.D88E     | NA          | 0.702   | 0.47 | 1       | NA                                  |
|         |            | chr17 | 27383288  | PIPOX     | NM_016518    | A   | C   | nonsynonymous | c.A1138C    | p.S380R    | NA          | 0.326   | 0.24 | 0.925   | NA                                  |
|         |            | chr17 | 39978517  | FKBP10    | NM_021939    | C   | T   | nonsynonymous | c.C1606T    | p.R536C    | NA          | 1       | 0.02 | 1       | NA                                  |
|         |            | chr5  | 112175303 | APC       | NM_001127510 | C   | T   | nonsynonymous | c.C4012T    | p.Q1338X   | APC         | NA      | NA   | 1       | COSM13129                           |
|         |            | chr17 | 72739280  | RAB37     | NM_001005638 | G   | A   | nonsynonymous | c.G259A     | p.A87T     | NA          | 1       | 0    | 1       | COSM1479973,COSM1479972,COSM1479971 |
|         |            | chr11 | 6470323   | TRIM3     | NM_001248006 | C   | A   | nonsynonymous | c.C2170T    | p.D724Y    | NA          | 1       | 0    | 1       | NA                                  |
|         |            | chr1  | 197111575 | ASPM      | NM_001206846 | G   | T   | nonsynonymous | c.C1807A    | p.H603N    | ASPM        | 0.976   | 0.4  | 1       | NA                                  |
|         |            | chr12 | 25398285  | KRAS      | NM_004985    | C   | A   | nonsynonymous | c.G34T      | p.G12C     | KRAS        | 1       | 0.01 | 1       | COSM1140136,COSM516                 |
|         |            | chr11 | 67012738  | KDM2A     | NM_012308    | C   | T   | nonsynonymous | c.C1642T    | p.R548W    | NA          | 0.999   | 0.02 | 0.997   | NA                                  |
|         |            | chr4  | 109672135 | ETNPPL    | NM_031279    | C   | T   | nonsynonymous | c.G658A     | p.G220R    | NA          | 1       | NA   | 1       | NA                                  |
|         |            | chr19 | 58320385  | ZNF552    | NM_024762    | C   | T   | nonsynonymous | c.G247A     | p.A83T     | NA          | 0.079   | 0.51 | 1       | NA                                  |
|         |            | chr1  | 111954712 | OVGP1     | NM_002557    | G   | A   | nonsynonymous | c.C1711T    | p.R571C    | NA          | 0.958   | 0.02 | 1       | COSM1648330,COSM1648331             |
|         |            | chr20 | 43851625  | SEMG3     | NM_003008    | C   | G   | nonsynonymous | c.C1352G    | p.T451R    | NA          | 0.003   | 0.84 | 1       | NA                                  |
|         |            | chr9  | 43625849  | SPATA31A6 | NM_001145196 | C   | G   | nonsynonymous | c.G2838C    | p.E946D    | NA          | 0.488   | 0.38 | 1       | NA                                  |
|         |            | chr4  | 187455223 | MTNR1A    | NM_005958    | G   | A   | nonsynonymous | c.C673T     | p.R225C    | NA          | 0.002   | 0.12 | 1       | NA                                  |
|         |            | chr4  | 114278764 | ANK2      | NM_001148    | C   | T   | nonsynonymous | c.C890T     | p.S2997F   | NA          | 0.874   | 0.02 | 1       | NA                                  |
|         |            | chr2  | 114512750 | SLC35F5   | NM_025181    | G   | A   | nonsynonymous | c.C265T     | p.L89F     | NA          | 0.999   | 0.06 | 1       | NA                                  |
|         |            | chr19 | 9048227   | MUC16     | NM_024690    | A   | G   | nonsynonymous | c.T33404C   | p.V11135A  | NA          | 0       | 0    | NA      | NA                                  |
|         |            | chr4  | 96761627  | POHA2     | NM_005390    | C   | T   | nonsynonymous | c.C326T     | p.S109L    | NA          | 0.846   | 0.29 | 0.99    | COSM1261822                         |
|         |            | chr2  | 152515652 | NEB       | NM_001217208 | T   | G   | nonsynonymous | c.A6002C    | p.K2001T   | NEB         | 1       | 0.05 | 1       | NA                                  |
|         |            | chr18 | 61570307  | SERPINE2  | NM_001143818 | A   | G   | nonsynonymous | c.A1016G    | p.N339S    | NA          | 0.939   | 0.01 | 1       | NA                                  |
|         |            | chr11 | 111177170 | COLCA2    | NM_001271458 | G   | A   | nonsynonymous | c.G209A     | p.R70Q     | NA          | NA      | NA   | NA      | NA                                  |
|         |            | chr19 | 30313229  | CCNE1     | NM_001238    | C   | T   | nonsynonymous | c.C923T     | p.S308L    | NA          | 1       | 0.7  | 1       | NA                                  |
|         |            | chr5  | 169835601 | FOXI1     | NM_144769    | G   | T   | nonsynonymous | c.G838T     | p.G280C    | NA          | 1       | 0    | 1       | NA                                  |
|         |            | chr3  | 38739105  | SCN10A    | NM_001293306 | C   | T   | nonsynonymous | c.G5603A    | p.R1868H   | NA          | 0.171   | 0.1  | 0.988   | NA                                  |
|         |            | chr17 | 56270739  | EPX       | NM_000502    | C   | A   | nonsynonymous | c.C178A     | p.Q60K     | NA          | 0.002   | 1    | 0.902   | NA                                  |
|         |            | chr17 | 72832510  | TMEM104   | NM_017728    | C   | T   | nonsynonymous | c.C1175T    | p.P392L    | NA          | 1       | 0.56 | 1       | NA                                  |
|         |            | chr11 | 72945731  | P2RY2     | NM_002564    | C   | T   | nonsynonymous | c.C527T     | p.A176V    | NA          | 0.001   | 0.44 | 1       | NA                                  |
|         |            | chr17 | 12905805  | ELAC2     | NM_001165962 | G   | A   | nonsynonymous | c.C1051T    | p.L351F    | NA          | 0.999   | 0.23 | 1       | NA                                  |
|         |            | chr4  | 2691303   | FAM193A   | NM_001256666 | A   | G   | nonsynonymous | c.A1529G    | p.H510R    | NA          | 0.999   | 0.06 | 1       | NA                                  |
|         |            | chr1  | 27332541  | FAM46B    | NM_052943    | C   | T   | nonsynonymous | c.G1172A    | p.R391H    | NA          | 0       | 0.18 | 0.995   | NA                                  |
|         |            | chr9  | 137620520 | COL5A1    | NM_000093    | C   | T   | nonsynonymous | c.C791T     | p.T264M    | NA          | 0.744   | 0.04 | 1       | COSM2157265                         |
|         |            | chr10 | 81697853  | SFTPD     | NM_003019    | C   | T   | nonsynonymous | c.G883A     | p.A295T    | NA          | 0.19    | 0.2  | 1       | NA                                  |
|         |            | chr16 | 80718449  | CDYL2     | NM_152342    | G   | A   | nonsynonymous | c.C602T     | p.A201V    | NA          | 0       | 0.53 | 1       | NA                                  |
|         |            | chr10 | 82348482  | SH2D4B    | NM_001145719 | C   | A   | nonsynonymous | c.C445A     | p.Q149K    | NA          | 0.996   | 0.07 | 0.983   | NA                                  |
|         |            | chr15 | 86838537  | AGBL1     | NM_152336    | C   | T   | nonsynonymous | c.C2134T    | p.R712W    | NA          | 1       | 0    | 0.887   | COSM3690677                         |
|         |            | chr3  | 187387985 | SST       | NM_001048    | C   | T   | nonsynonymous | c.G95A      | p.R32H     | NA          | 1       | 0.18 | 1       | NA                                  |
|         |            | chr5  | 149677523 | ARSI      | NM_001012301 | C   | T   | nonsynonymous | c.G964A     | p.G322S    | NA          | 1       | 0.01 | 1       | NA                                  |
|         |            | chr5  | 141237011 | PCDH1     | NM_032420    | G   | A   | nonsynonymous | c.C3125T    | p.S1042L   | NA          | 1       | 0    | 1       | NA                                  |
|         |            | chrX  | 48207025  | SSX3      | NM_021014    | C   | T   | nonsynonymous | c.G481A     | p.E161K    | NA          | 0       | 1    | 1       | NA                                  |
|         |            | chr17 | 42854546  | ADAM11    | NM_002390    | G   | A   | nonsynonymous | c.C1694A    | p.R559H    | NA          | 0.996   | 0.02 | 1       | NA                                  |
|         |            | chr5  | 137766019 | KDM3B     | NM_016604    | C   | T   | nonsynonymous | c.C4975T    | p.R1659C   | NA          | 1       | 0    | 1       | COSM175846                          |
|         |            | chr18 | 22807094  | ZNF521    | NM_015461    | T   | C   | nonsynonymous | c.A788G     | p.K263R    | ZNF521      | 0.071   | 0.58 | 0.702   | NA                                  |
|         |            | chr1  | 6681651   | PHF13     | NM_153812    | G   | A   | nonsynonymous | c.G857A     | p.R286H    | NA          | 0.999   | 0.03 | 1       | NA                                  |
|         |            | chrX  | 38135983  | RPGR      | NM_000328    | C   | T   | nonsynonymous | c.G1948A    | p.V650M    | RPGR        | 0.009   | 0.15 | 1       | NA                                  |
|         |            | chr5  | 54423155  | CDC20B    | NM_152823    | G   | A   | nonsynonymous | c.C919T     | p.R307W    | NA          | 0.999   | 0    | 1       | NA                                  |
|         |            | chrX  | 135958730 | RBMX      | NM_002139    | C   | A   | nonsynonymous | c.G473T     | p.G158V    | RBMX        | 0.802   | 0.09 | 0       | NA                                  |
|         |            | chr7  | 5415673   | TNRC18    | NM_001080495 | G   | A   | nonsynonymous | c.C2791T    | p.Q931X    | NA          | NA      | 0.08 | 1       | NA                                  |
|         |            | chr7  | 142458526 | PRSS1     | NM_002769    | A   | G   | nonsynonymous | c.A181G     | p.N54S     | NA          | 0       | 0.51 | 0       | NA                                  |
|         |            | chr17 | 39394674  | KRTAP9-8  | NM_031963    | A   | G   | nonsynonymous | c.A371G     | p.N124S    | NA          | 0.006   | 1    | 1       | NA                                  |
|         |            | chr2  | 131797751 | ARHGEF4   | NM_015320    | C   | T   | nonsynonymous | c.C910T     | p.R304C    | NA          | 0.999   | 0    | 1       | NA                                  |
|         |            | chr1  | 36564618  | COL8A2    | NM_005022    | C   | T   | nonsynonymous | c.G664A     | p.G222R    | NA          | 0       | 0.45 | 0.803   | NA                                  |
|         |            | chr13 | 109792732 | MYO16     | NM_015011    | C   | A   | nonsynonymous | c.C4106A    | p.S1369Y   | NA          | 0.845   | NA   | 1       | NA                                  |
|         |            | chr5  | 156279    | PLEKHG4B  | NM_052909    | G   | A   | nonsynonymous | c.G1234A    | p.V412I    | NA          | 0.968   | 0.45 | 1       | COSM1221148                         |
|         |            | chr2  | 168929996 | SCN1A     | NM_006920    | C   | T   | nonsynonymous | c.G136A     | p.E46K     | NA          | 0.941   | 0.03 | 1       | COSM1325785,COSM1325784             |
|         |            | chr22 | 24581995  | SUSD2     | NM_019601    | G   | A   | nonsynonymous | c.G1351A    | p.G451R    | NA          | 1       | 0    | 1       | NA                                  |
|         |            | chr5  | 140594292 | PCDH813   | NM_018933    | A   | C   | nonsynonymous | c.A597C     | p.K199N    | NA          | 0.992   | 0.01 | 1       | NA                                  |
|         |            | chr22 | 20460526  | RIMBP3    | NM_015672    | C   | T   | nonsynonymous | c.G776A     | p.R259H    | NA          | 0.995   | 0.26 | 1       | NA                                  |
|         |            | chrX  | 101912757 | GPRASP1   | NM_001099410 | A   | T   | nonsynonymous | c.A3916T    | p.N1306Y   | NA          | 1       | 0.01 | 1       | NA                                  |
|         |            | chr19 | 15292500  | NOTCH3    | NM_000435    | G   | T   | nonsynonymous | c.C2679A    | p.S893R    | NA          | 1       | 0    | 1       | NA                                  |
|         |            | chr1  | 152279527 | FLG       | NM_002016    | T   | C   | nonsynonymous | c.A7835G    | p.D2612G   | NA          | 0.949   | 0.65 | 1       | NA                                  |
|         |            | chr15 | 44038842  | PDIA3     | NM_005313    | C   | G   | nonsynonymous | c.C105G     | p.F35L     | NA          | 1       | 0.02 | 1       | NA                                  |
|         |            | chr4  | 170042033 | SH3RF1    | NM_020870    | C   | G   | nonsynonymous | c.G1454C    | p.G485A    | NA          | 1       | 0    | 1       | NA                                  |
|         |            | chr11 | 62294315  | AHNAK     | NM_001620    | G   | C   | nonsynonymous | c.C7574G    | p.A2525G   | AHNAK       | 0       | 0.04 | 0.996   | NA                                  |
|         |            | chr5  | 173035291 | BOD1      | NM_001159651 | G   | A   | nonsynonymous | c.C367T     | p.R123C    | NA          | 0       | 0.05 | 1       | NA                                  |
|         |            | chr7  | 98554034  | TRRAP     | NM_003496    | G   | A   | nonsynonymous | c.A6034G    | p.M2012V   | NA          | 0.001   | 0.31 | 0.996   | NA                                  |
|         |            | chr4  | 106755675 | GSTCD     | NM_024751    | A   | G   | nonsynonymous | c.A1327G    | p.T443A    | NA          | 0       | 1    | 1       | NA                                  |
|         |            | chr11 | 130785060 | SNX19     | NM_014758    | A   | T   | nonsynonymous | c.T775A     | p.W259R    | NA          | 1       | 0.05 | 1       | NA                                  |

Supplementary Table 2.2

| Primary | Metastasis | Chrom | Position  | Gene Name | NCBI Ref Seq | Ref | Var | Mutation      | Base Change | Amino Acid | Cancer Gene | Polyphen | SIFT | mutationtaster | COSMIC                  |
|---------|------------|-------|-----------|-----------|--------------|-----|-----|---------------|-------------|------------|-------------|----------|------|----------------|-------------------------|
| ✓       | ✓          | chr16 | 10525156  | ATF7IP2   | NM_001256160 | G   | T   | nonsynonymous | c.G679T     | p.V227L    | NA          | 0.033    | 0.27 | 0.971          | NA                      |
| ✓       | ✓          | chr8  | 51465694  | SNTG1     | NM_001287813 | G   | T   | nonsynonymous | c.G765T     | p.W255C    | NA          | 1        | 0    | 1              | NA                      |
| ✓       | ✓          | chr3  | 38648271  | SCN5A     | NM_001160160 | C   | A   | nonsynonymous | c.G1029T    | p.K343N    | NA          | 1        | 0    | 0.99           | NA                      |
| ✓       | ✓          | chr5  | 666171    | TPPP      | NM_007030    | G   | A   | nonsynonymous | c.C379T     | p.R127X    | NA          | NA       | 1    | 1              | NA                      |
| ✓       | ✓          | chr6  | 56883251  | BEND6     | NM_152731    | G   | T   | nonsynonymous | c.G745T     | p.D249Y    | NA          | 1        | 0    | 1              | NA                      |
| ✓       | ✓          | chr1  | 46290133  | MAST2     | NM_015112    | T   | G   | nonsynonymous | c.T206G     | p.L69R     | MAST2       | 0.028    | 0.84 | 1              | NA                      |
| ✓       | ✓          | chr4  | 114279178 | ANK2      | NM_001148    | G   | T   | nonsynonymous | c.G9404T    | p.G3135V   | NA          | 0.998    | 0    | 1              | NA                      |
| ✓       | ✓          | chr20 | 60585112  | TAF4      | NM_003185    | G   | A   | nonsynonymous | c.C1751T    | p.S584L    | NA          | 0.495    | 0.29 | 0.882          | NA                      |
| ✓       | ✓          | chr10 | 84718709  | NRG3      | NM_001165972 | C   | T   | nonsynonymous | c.C1159T    | p.Q387X    | NA          | NA       | 0.04 | 1              | NA                      |
| ✓       | ✓          | chr8  | 59851979  | TOX       | NM_014729    | T   | C   | nonsynonymous | c.A293G     | p.H98R     | NA          | 0.851    | NA   | 0.996          | NA                      |
| ✓       | ✓          | chr3  | 13607689  | STAG1     | NM_005862    | C   | T   | nonsynonymous | c.G2938A    | p.D980N    | NA          | 1        | 0.34 | 1              | NA                      |
| ✓       | ✓          | chr7  | 32909394  | KBTBD2    | NM_015483    | T   | C   | nonsynonymous | c.A1445G    | p.N482S    | NA          | 0.003    | 0.76 | 1              | NA                      |
| ✓       | ✓          | chr1  | 228504485 | OBSON     | NM_001271223 | C   | T   | nonsynonymous | c.C16232T   | p.T5411M   | NA          | 0.995    | 0.13 | 1              | NA                      |
| ✓       | ✓          | chr2  | 215880335 | ABCA12    | NM_015657    | G   | A   | nonsynonymous | c.C881T     | p.P294L    | NA          | 0        | 0.24 | 1              | NA                      |
| ✓       | ✓          | chr11 | 117299235 | DSCAML1   | NM_020693    | T   | G   | nonsynonymous | c.A6151C    | p.T2051P   | NA          | 0        | 0.06 | 1              | NA                      |
| ✓       | ✓          | chr12 | 58144548  | CDK4      | NM_000075    | C   | A   | nonsynonymous | c.G523T     | p.V175F    | CDK4        | 0.964    | 0    | 1              | NA                      |
| ✓       | ✓          | chr4  | 186545169 | SORBS2    | NM_021069    | C   | T   | nonsynonymous | c.G1402A    | p.E468K    | NA          | 1        | 0.05 | 1              | NA                      |
| ✓       | ✓          | chr16 | 15917267  | MYH11     | NM_002474    | G   | A   | nonsynonymous | c.C347T     | p.T116M    | MYH11       | 1        | 0    | 1              | COSM290683,COSM290682   |
| ✓       | ✓          | chr8  | 77767363  | ZFH4      | NM_024721    | C   | T   | nonsynonymous | c.C8206T    | p.P2736S   | NA          | 0.037    | 0.89 | 0.999          | NA                      |
| ✓       | ✓          | chr12 | 9254240   | A2M       | NM_000014    | C   | T   | nonsynonymous | c.T1297A    | p.G433S    | NA          | 0.017    | 0.8  | 1              | NA                      |
| ✓       | ✓          | chr1  | 103471858 | COL11A1   | NM_080630    | A   | G   | nonsynonymous | c.T1349C    | p.V450A    | NA          | 0.042    | 0.96 | 0.998          | NA                      |
| ✓       | ✓          | chr8  | 106814316 | ZFPM2     | NM_012082    | A   | G   | nonsynonymous | c.A2006G    | p.D669G    | NA          | 0.877    | 0.24 | 1              | NA                      |
| ✓       | ✓          | chr1  | 3645901   | TP73      | NM_001204187 | G   | A   | nonsynonymous | c.G1085A    | p.R362Q    | NA          | 1        | 0.01 | 1              | NA                      |
| ✓       | ✓          | chr19 | 8613192   | MYO1F     | NM_012335    | G   | T   | nonsynonymous | c.C1111A    | p.R371S    | NA          | 0.036    | 0.63 | 0.913          | NA                      |
| ✓       | ✓          | chr1  | 217975125 | SPATA17   | NM_138796    | A   | C   | nonsynonymous | c.A938C     | p.K313T    | NA          | 0.221    | 0.15 | 0.995          | NA                      |
| ✓       | ✓          | chr5  | 16694700  | MYO10     | NM_012334    | G   | A   | nonsynonymous | c.C3580T    | p.R1194C   | NA          | 1        | 0    | 1              | NA                      |
| ✓       | ✓          | chr7  | 48563978  | ABCA13    | NM_152701    | G   | A   | nonsynonymous | c.G14186A   | p.R4729H   | NA          | 0.003    | 0.23 | 1              | NA                      |
| ✓       | ✓          | chr11 | 117279728 | CEP164    | NM_014956    | G   | T   | nonsynonymous | c.G3732T    | p.W1244C   | NA          | 1        | 0.18 | 0.996          | NA                      |
| ✓       | ✓          | chr11 | 44069747  | ACCSL     | NM_001031854 | C   | T   | nonsynonymous | c.C161T     | p.S54L     | NA          | 0        | 0.36 | 1              | NA                      |
| ✓       | ✓          | chr12 | 112701998 | HECTD4    | NM_001109662 | G   | A   | nonsynonymous | c.C2206T    | p.R736C    | NA          | 0.007    | 0    | 1              | NA                      |
| ✓       | ✓          | chr11 | 66392695  | RBM14     | NM_006328    | G   | A   | nonsynonymous | c.G1348A    | p.A450T    | NA          | 0.999    | 0.01 | 1              | NA                      |
| ✓       | ✓          | chr6  | 50810945  | TFAP2B    | NM_003221    | C   | T   | nonsynonymous | c.C1223T    | p.P408L    | NA          | 1        | 0.03 | 1              | NA                      |
| ✓       | ✓          | chr15 | 28520057  | HERC2     | NM_004687    | G   | A   | nonsynonymous | c.C637T     | p.R213X    | NA          | NA       | 1    | 1              | NA                      |
| ✓       | ✓          | chr20 | 5203324   | PROROKR2  | NM_144773    | G   | T   | nonsynonymous | c.C517A     | p.L173M    | NA          | 0.989    | 0.02 | 0.999          | NA                      |
| ✓       | ✓          | chr5  | 112164646 | APC       | NM_001127510 | G   | T   | nonsynonymous | c.G1720T    | p.E574X    | APC         | NA       | 0.09 | 1              | NA                      |
| ✓       | ✓          | chr10 | 27687804  | PTCHD3    | NM_001034842 | C   | T   | nonsynonymous | c.G1723A    | p.D575N    | NA          | 0.242    | 0.41 | 1              | NA                      |
| ✓       | ✓          | chr11 | 119053871 | NLRX1     | NM_001282358 | G   | A   | nonsynonymous | c.G2651A    | p.R884Q    | NA          | 0.07     | 0.34 | 1              | NA                      |
| ✓       | ✓          | chr11 | 48373961  | UNKNOWN   |              | A   | T   | nonsynonymous |             |            | NA          | NA       | NA   | NA             | NA                      |
| ✓       | ✓          | chr10 | 52603881  | A1CF      | NM_001198820 | T   | G   | nonsynonymous | c.A125C     | p.E42A     | NA          | 0.998    | 0.04 | 1              | NA                      |
| ✓       | ✓          | chr8  | 59059734  | FAM110B   | NM_147189    | C   | A   | nonsynonymous | c.C945A     | p.S315R    | NA          | 0.999    | NA   | 1              | NA                      |
| ✓       | ✓          | chr1  | 115258747 | NRAS      | NM_002524    | C   | A   | nonsynonymous | c.G35T      | p.G12V     | NRAS        | 0.613    | 0.01 | 1              | COSM566                 |
| ✓       | ✓          | chr19 | 52130463  | SIGLEC5   | NM_003830    | G   | C   | nonsynonymous | c.C1321G    | p.L441V    | NA          | 0.799    | 0.85 | 1              | NA                      |
| ✓       | ✓          | chr15 | 41810233  | RPAP1     | NM_015540    | A   | T   | nonsynonymous | c.T3943A    | p.F1315I   | NA          | 0.995    | 0    | 1              | NA                      |
| ✓       | ✓          | chr22 | 28193785  | MN1       | NM_002430    | G   | T   | nonsynonymous | c.C2747A    | p.T916N    | MN1         | 0.13     | 0.16 | 0.768          | NA                      |
| ✓       | ✓          | chr2  | 17946759  | TTN       | NM_001267550 | C   | A   | nonsynonymous | c.G84100T   | p.E28034X  | NA          | NA       | 0    | 1              | NA                      |
| ✓       | ✓          | chr11 | 32635763  | CCDC73    | NM_001008391 | G   | A   | nonsynonymous | c.C2101T    | p.P701S    | NA          | 0.003    | 0.49 | 0.997          | NA                      |
| ✓       | ✓          | chr9  | 131483555 | ZDHHC12   | NM_032799    | G   | A   | nonsynonymous | c.C709T     | p.R237C    | NA          | 0.998    | 0.13 | 1              | NA                      |
| ✓       | ✓          | chr17 | 17129519  | FLCN      | NM_144606    | G   | A   | nonsynonymous | c.C367T     | p.Q123X    | FLCN        | NA       | 0.29 | 1              | NA                      |
| ✓       | ✓          | chr11 | 65978634  | PACS1     | NM_018026    | C   | A   | nonsynonymous | c.C564A     | p.N188K    | NA          | 0.999    | 0    | 1              | NA                      |
| ✓       | ✓          | chr21 | 30934019  | GRIK1     | NM_175611    | G   | A   | nonsynonymous | c.C2237T    | p.T746M    | NA          | 1        | 0.04 | 1              | COSM1253702,COSM1253701 |
| ✓       | ✓          | chr6  | 163956109 | QKI       | NM_206853    | C   | G   | nonsynonymous | c.C498G     | p.I166M    | QKI         | 0.112    | 0.01 | 1              | NA                      |
| ✓       | ✓          | chr2  | 37105068  | STRN      | NM_003162    | G   | A   | nonsynonymous | c.C1289T    | p.T430M    | NA          | 1        | 0.02 | 1              | NA                      |
| ✓       | ✓          | chr20 | 35444571  | SOGA1     | NM_080627    | T   | C   | nonsynonymous | c.A1274G    | p.D425G    | NA          | 1        | 0.03 | 1              | NA                      |
| ✓       | ✓          | chrX  | 133700173 | PLAC1     | NM_021796    | T   | G   | nonsynonymous | c.A540C     | p.Q180H    | NA          | 0.02     | 0    | 1              | NA                      |
| ✓       | ✓          | chr2  | 22644728  | NYAP2     | NM_020864    | G   | A   | nonsynonymous | c.G1105A    | p.V369M    | NA          | 0.997    | 0.08 | 1              | NA                      |
| ✓       | ✓          | chr7  | 46391820  | ABCA13    | NM_152701    | C   | T   | nonsynonymous | c.C10424T   | p.S3475L   | NA          | 0.611    | 0.02 | 1              | NA                      |
| ✓       | ✓          | chr12 | 75801447  | KCNK2     | NM_001260499 | C   | T   | nonsynonymous | c.G317A     | p.R106Q    | NA          | 1        | 0    | 1              | NA                      |
| ✓       | ✓          | chr11 | 120811150 | GRIK4     | NM_001284273 | T   | A   | nonsynonymous | c.T1571A    | p.I524N    | NA          | 1        | 0    | 1              | NA                      |
| ✓       | ✓          | chr2  | 167145040 | SCN9A     | NM_002977    | T   | G   | nonsynonymous | c.A1221C    | p.E407D    | NA          | 1        | 0.03 | 0.998          | NA                      |
| ✓       | ✓          | chr1  | 205631135 | SLC45A3   | NM_033102    | C   | T   | nonsynonymous | c.G1078A    | p.A360T    | SLC45A3     | 0.02     | 0.16 | 0.919          | NA                      |
| ✓       | ✓          | chr1  | 152275373 | FLG       | NM_002016    | C   | T   | nonsynonymous | c.G11989A   | p.G3997R   | NA          | 0.981    | 0.53 | 1              | NA                      |
| ✓       | ✓          | chrX  | 17819893  | RAI2      | NM_001172743 | C   | T   | nonsynonymous | c.C238A     | p.P80T     | NA          | 1        | 0.01 | 1              | NA                      |
| ✓       | ✓          | chr7  | 94293611  | PEG10     | NM_001172438 | G   | A   | nonsynonymous | c.G971A     | p.R324H    | NA          | 0.998    | 0.21 | 1              | NA                      |
| ✓       | ✓          | chr6  | 7374272   | CAGE1     | NM_001170692 | C   | A   | nonsynonymous | c.G780T     | p.E260D    | NA          | 0.004    | 1    | 1              | NA                      |
| ✓       | ✓          | chr5  | 112175328 | APC       | NM_001127510 | C   | A   | nonsynonymous | c.C4037A    | p.S1346X   | APC         | NA       | NA   | 1              | COSM19084               |
| ✓       | ✓          | chr10 | 49929315  | WDFY4     | NM_020945    | G   | A   | nonsynonymous | c.C359A     | p.R120Q    | NA          | 1        | 0.06 | 0.783          | NA                      |
| ✓       | ✓          | chr15 | 43574260  | TGM7      | NM_052955    | G   | A   | nonsynonymous | c.C1133T    | p.S378F    | NA          | 1        | 0.01 | 1              | NA                      |
| ✓       | ✓          | chr17 | 7577548   | TP53      | NM_001276761 | C   | T   | nonsynonymous | c.G616A     | p.G206S    | TP53        | 1        | 0    | 1              | COSM1640833,COSM121036  |
| ✓       | ✓          | chr6  | 90422940  | MDN1      | NM_014611    | C   | T   | nonsynonymous | c.G7145A    | p.S2382N   | MDN1        | 0.239    | 0.17 | 0.883          | NA                      |
| ✓       | ✓          | chrX  | 32536138  | DMD       | NM_000109    | T   | G   | nonsynonymous | c.A2255C    | p.K752T    | DMD         | 0.002    | 0.08 | 1              | NA                      |
| ✓       | ✓          | chr15 | 56122103  | NEDD4     | NM_001284340 | C   | G   | nonsynonymous | c.G3901C    | p.V1301L   | NA          | 1        | 0    | 1              | NA                      |
| ✓       | ✓          | chr22 | 40417962  | FAM83F    | NM_138435    | T   | A   | nonsynonymous | c.T1448A    | p.I483N    | NA          | 0.003    | 0.01 | 1              | NA                      |
| ✓       | ✓          | chr21 | 43691270  | ABCG1     | NM_207629    | C   | G   | nonsynonymous | c.C368G     | p.T123R    | NA          | 1        | NA   | 1              | NA                      |
| ✓       | ✓          | chr11 | 101771267 | ANGPTL5   | NM_178127    | C   | A   | nonsynonymous | c.G555T     | p.M185I    | NA          | 1        | 0.12 | 1              | NA                      |
| ✓       | ✓          | chr10 | 15821128  | FAM188A   | NM_024948    | C   | G   | nonsynonymous | c.G1201C    | p.E401Q    | NA          | 0.993    | 0.54 | 1              | NA                      |
| ✓       | ✓          | chr19 | 9071750   | MUC16     | NM_024690    | T   | C   | nonsynonymous | c.A15696C   | p.K5232N   | NA          | 0.349    | 0    | 1              | NA                      |
| ✓       | ✓          | chr1  | 225156539 | DNAH14    | NM_001145154 | T   | C   | nonsynonymous | c.T730C     | p.Y244H    | NA          | 0.019    | 0.58 | 1              | NA                      |
| ✓       | ✓          | chr6  | 153345483 | RGS17     | NM_012419    | A   | C   | nonsynonymous | c.T358G     | p.L120V    | NA          | 0.64     | 0.01 | 1              | NA                      |
| ✓       | ✓          | chr5  | 178140358 | ZNF354A   | NM_005649    | A   | T   | nonsynonymous | c.T521A     | p.L174H    | NA          | 0.005    | 0    | 1              | NA                      |
| ✓       | ✓          | chr1  | 211192300 | KCNH1     | NM_002238    | A   | C   | nonsynonymous | c.T857G     | p.L286R    | NA          | 1        | 0.26 | 1              | NA                      |
| ✓       | ✓          | chr5  | 106762962 | EFNA5     | NM_001962    | G   | T   | nonsynonymous | c.C374A     | p.S125Y    | NA          | 1        | 0.08 | 1              | NA                      |
| ✓       | ✓          | chr1  | 16258997  | SPEN      | NM_015001    | G   | C   | nonsynonymous | c.G6262C    | p.D2088H   | SPEN        | 0.996    | 0.02 | 0.988          | NA                      |
| ✓       | ✓          | chr21 | 19638334  | CHODL     | NM_001204178 | A   | C   | nonsynonymous | c.A575C     | p.K192T    | NA          | 0.001    | NA   | 0.538          | NA                      |
| ✓       | ✓          | chr2  | 21228452  | APOB      | NM_000384    | A   | C   | nonsynonymous | c.T11288G   | p.L3763R   | NA          | 0.999    | 0    | 1              | NA                      |
| ✓       | ✓          | chr22 | 26898017  | TFIP11    | NM_012143    | T   | A   | nonsynonymous | c.A650T     | p.E217V    | NA          | 0.914    | 0.08 | 1              | NA                      |
| ✓       | ✓          | chr2  | 11716651  | GREB1     | NM_148903    | G   | C   | nonsynonymous | c.G627C     | p.W209C    | NA          | 1        | 0    | 1              | NA                      |
| ✓       | ✓          | chrX  | 154157378 | F8        | NM_000132    | C   | G   | nonsynonymous | c.G4687C    | p.V1563L   | F8          | 0        | 0.89 | 1              | NA                      |
| ✓       | ✓          | chr22 | 46930524  | CELSR1    | NM_014246    | C   | T   | nonsynonymous | c.G2544A    | p.M848I    | NA          | 0.016    | 0.17 | 0.997          | NA                      |
| ✓       | ✓          | chr5  | 127866348 | FBN2      | NM_001999    | G   | T   | nonsynonymous | c.C376A     | p.R126S    | FBN2        | 0.997    | 0.24 | 1              | NA                      |
| ✓       | ✓          | chr12 | 25260947  | LRMP      | NM_001204127 | T   | A   | nonsynonymous | c.T1453A    | p.L485M    | NA          | 0.997    | 0.05 | 0.998          | NA                      |
| ✓       | ✓          | chr14 | 20711786  | OR11H4    | NM_001004479 | T   | C   | nonsynonymous | c.T836C     | p.L279S    | NA          | 0.051    | 0.27 |                |                         |

Supplementary Table 2.3

| Primary | Metastasis | Chrom | Positions | Gene Name      | NCBI Ref Seq | Ref | Var | Mutation       | Case Change |
|---------|------------|-------|-----------|----------------|--------------|-----|-----|----------------|-------------|
| ✓       | ✓          | chr3  | 47888401  | DHX30          | NM_014966    | C   | T   | synonymous SNV | c.C1722T    |
| ✓       | ✓          | chr17 | 19318460  | RNF112         | NM_007148    | C   | T   | synonymous SNV | c.C1236T    |
| ✓       | ✓          | chr14 | 69995041  | PLEKHD1        | NM_001161498 | C   | A   | synonymous SNV | c.C1426A    |
| ✓       | ✓          | chr9  | 136573457 | SARDH          | NM_001134707 | G   | A   | synonymous SNV | c.C1422T    |
| ✓       | ✓          | chr16 | 72991729  | ZFHX3          | NM_006885    | C   | T   | synonymous SNV | c.G2316A    |
| ✓       | ✓          | chr19 | 39906041  | PLEKHG2        | NM_022835    | G   | A   | synonymous SNV | c.G441A     |
| ✓       | ✓          | chr22 | 36691101  | MYH9           | NM_002473    | C   | A   | synonymous SNV | c.G3507T    |
| ✓       | ✓          | chr20 | 2736298   | EBF4           | NM_001110514 | G   | A   | synonymous SNV | c.G1554A    |
| ✓       | ✓          | chr20 | 42144040  | L3MBTL1        | NM_032107    | G   | A   | synonymous SNV | c.G696A     |
| ✓       | ✓          | chr11 | 92600167  | FAT3           | NM_001008781 | G   | A   | synonymous SNV | c.G11919A   |
| ✓       | ✓          | chr13 | 36744857  | CCDC169-SOHLH2 | NM_001198910 | C   | T   | synonymous SNV | c.G1299A    |
| ✓       | ✓          | chr1  | 215775446 | KCTD3          | NM_016121    | G   | A   | synonymous SNV | c.G1041A    |
| ✓       | ✓          | chr19 | 5231460   | PTPRS          | NM_002850    | G   | A   | synonymous SNV | c.C2016T    |
| ✓       | ✓          | chr20 | 8745967   | PLCB1          | NM_182734    | C   | T   | synonymous SNV | c.C2892T    |
| ✓       | ✓          | chrX  | 47433829  | SYN1           | NM_133499    | G   | A   | synonymous SNV | c.C1554T    |
| ✓       | ✓          | chr16 | 84014711  | NECAB2         | NM_019065    | G   | A   | synonymous SNV | c.G438A     |
| ✓       | ✓          | chrX  | 53114852  | TSPYL2         | NM_022117    | C   | T   | synonymous SNV | c.C1278T    |
| ✓       | ✓          | chr1  | 17266463  | CROCC          | NM_014675    | C   | T   | synonymous SNV | c.C1683T    |
| ✓       | ✓          | chr3  | 75714853  | FRG2C          | NM_001124759 | G   | A   | synonymous SNV | c.G510A     |
| ✓       | ✓          | chr2  | 109382170 | RANBP2         | NM_006267    | A   | G   | synonymous SNV | c.A5175G    |
| ✓       | ✓          | chr1  | 247200886 | ZNF670         | NM_033213    | C   | T   | synonymous SNV | c.G1035A    |
| ✓       | ✓          | chrX  | 51075841  | NUDT10         | NM_153183    | A   | G   | synonymous SNV | c.A24G      |
| ✓       | ✓          | chr17 | 39767744  | KRT16          | NM_005557    | A   | G   | synonymous SNV | c.T624C     |
| ✓       | ✓          | chr2  | 207620124 | MDH1B          | NM_001039845 | C   | T   | synonymous SNV | c.G519A     |
|         | ✓          | chr1  | 74819758  | FPGT-TNNI3K    | NM_001199327 | C   | T   | synonymous SNV | c.C1464T    |
|         | ✓          | chr1  | 54675662  | MRPL37         | NM_016491    | G   | T   | synonymous SNV | c.G690T     |
|         | ✓          | chr22 | 37482336  | TMPPRS6        | NM_001289000 | C   | T   | synonymous SNV | c.G960A     |
|         | ✓          | chr17 | 56057986  | VEZF1          | NM_007146    | T   | G   | synonymous SNV | c.A954C     |
|         | ✓          | chr10 | 70892791  | VPS26A         | NM_004896    | C   | T   | synonymous SNV | c.C141T     |
|         | ✓          | chr1  | 82416003  | LPHN2          | NM_001297705 | G   | C   | synonymous SNV | c.G1329C    |
|         | ✓          | chr14 | 105410001 | AHNAK2         | NM_138420    | A   | C   | synonymous SNV | c.T11787G   |
|         | ✓          | chr16 | 2152949   | PKD1           | NM_001009944 | A   | G   | synonymous SNV | c.T8814C    |
|         | ✓          | chr10 | 46968591  | SYT15          | NM_031912    | G   | A   | synonymous SNV | c.C345T     |
|         | ✓          | chr5  | 122522784 | PRDM6          | NM_001136239 | C   | T   | synonymous SNV | c.C1677T    |
|         | ✓          | chr1  | 75037305  | ERICH3         | NM_001002912 | C   | T   | synonymous SNV | c.G4089A    |
|         | ✓          | chr2  | 132236963 | TUBA3D         | NM_080386    | C   | T   | synonymous SNV | c.C309T     |

Supplementary Table 2.4

| Primary | Metastasis | Chrom | Positions | Gene Name | NCBI Ref Seq | Ref | Var | Mutation       | Case Change |
|---------|------------|-------|-----------|-----------|--------------|-----|-----|----------------|-------------|
| ✓       | ✓          | chr9  | 125377121 | OR1Q1     | NM_012364    | C   | T   | synonymous SNV | c.C105T     |
| ✓       | ✓          | chr4  | 138452430 | PCDH18    | NM_019035    | C   | T   | synonymous SNV | c.G813A     |
| ✓       | ✓          | chr2  | 201284122 | SPATS2L   | NM_001282743 | G   | T   | synonymous SNV | c.G168T     |
| ✓       | ✓          | chr3  | 130649319 | ATP2C1    | NM_001199180 | A   | G   | synonymous SNV | c.A168G     |
| ✓       | ✓          | chr10 | 98144513  | TLL2      | NM_012465    | G   | A   | synonymous SNV | c.C2025T    |
| ✓       | ✓          | chr15 | 85407757  | ALPK3     | NM_020778    | G   | A   | synonymous SNV | c.G5190A    |
| ✓       | ✓          | chr5  | 131543488 | P4HA2     | NM_001142598 | G   | A   | synonymous SNV | c.C993T     |
| ✓       | ✓          | chr11 | 27077130  | BBOX1     | NM_003986    | G   | T   | synonymous SNV | c.G153T     |
| ✓       | ✓          | chrX  | 82763698  | POU3F4    | NM_000307    | G   | A   | synonymous SNV | c.G366A     |
| ✓       | ✓          | chr6  | 33740438  | LEMD2     | NM_001143944 | A   | T   | synonymous SNV | c.T573A     |
| ✓       | ✓          | chr16 | 27448836  | IL21R     | NM_021798    | C   | T   | synonymous SNV | c.C180T     |
| ✓       | ✓          | chr13 | 27998976  | GTF3A     | NM_002097    | C   | T   | synonymous SNV | c.C102T     |
| ✓       | ✓          | chr2  | 220396566 | ASIC4     | NM_182847    | C   | T   | synonymous SNV | c.C1050T    |
| ✓       | ✓          | chr2  | 220379560 | ASIC4     | NM_182847    | C   | G   | synonymous SNV | c.C495G     |
| ✓       | ✓          | chr3  | 3887633   | LRRN1     | NM_020873    | C   | T   | synonymous SNV | c.C1308T    |
| ✓       | ✓          | chr11 | 77090350  | PAK1      | NM_001128620 | C   | T   | synonymous SNV | c.G375A     |
| ✓       | 0          | chr9  | 122004349 | BRINP1    | NM_014618    | G   | T   | synonymous SNV | c.C555A     |
| ✓       | 0          | chr6  | 42075218  | C6orf132  | NM_001164446 | T   | G   | synonymous SNV | c.A432C     |
| ✓       | 0          | chr12 | 81004322  | PTPRQ     | NM_001145026 | C   | A   | synonymous SNV | c.C4320A    |
| ✓       | 0          | chr19 | 58549366  | ZSCAN1    | NM_182572    | C   | G   | synonymous SNV | c.C162G     |
| ✓       | 0          | chr7  | 6547862   | GRID2IP   | NM_001145118 | G   | A   | synonymous SNV | c.C2298T    |
| ✓       | 0          | chr4  | 37962070  | PTTG2     | NM_006607    | C   | A   | synonymous SNV | c.C15A      |
| 0       | ✓          | chr6  | 28093407  | ZSCAN16   | NM_025231    | G   | C   | synonymous SNV | c.G186C     |
| 0       | ✓          | chr1  | 156641628 | NES       | NM_006617    | A   | G   | synonymous SNV | c.T2352C    |
| 0       | ✓          | chr14 | 73763919  | NUMB      | NM_001005743 | C   | T   | synonymous SNV | c.G309A     |
| 0       | ✓          | chr10 | 135026321 | KNDC1     | NM_152643    | C   | T   | synonymous SNV | c.C4338T    |
| 0       | ✓          | chr1  | 153748219 | SLC27A3   | NM_024330    | C   | T   | synonymous SNV | c.C387T     |
| 0       | ✓          | chrX  | 148044425 | AFF2      | NM_001169123 | T   | C   | synonymous SNV | c.T2841C    |
| 0       | ✓          | chr5  | 140562218 | PCDHB16   | NM_020957    | C   | A   | synonymous SNV | c.C84A      |
| 0       | ✓          | chr19 | 1785228   | ATP8B3    | NM_001178002 | G   | A   | synonymous SNV | c.C3351T    |
| 0       | ✓          | chr15 | 54435225  | UNC13C    | NM_001080534 | T   | C   | synonymous SNV | c.T2994C    |
| 0       | ✓          | chr2  | 231223717 | SP140L    | NM_138402    | A   | G   | synonymous SNV | c.A309G     |
| 0       | ✓          | chr16 | 24966014  | ARHGAP17  | NM_001006634 | T   | A   | synonymous SNV | c.A762T     |

## **Supplementary Table 2 - Nonsynonymous detected by population exome sequencing**

These tables list all nonsynonymous somatic mutations detected in the primary and/or metastatic tumors of CRC1 (ST2.1) and CRC2 (ST2.2). The annotations for each mutation are as follows: chromosome positions, reference/variant alleles, nucleotide change and amino acid change, COSMIC mutations, Cancer Gene Census, Polyphen, SIFT and MutationTaster.

Supplementary Table 3

|        |     |           |          |     | normal - Deep Sequencing |         |         |         |         |         |             | primary - Deep Sequencing |         |         |         |         |             |             | Met - Exome Sequencing |         |             |
|--------|-----|-----------|----------|-----|--------------------------|---------|---------|---------|---------|---------|-------------|---------------------------|---------|---------|---------|---------|-------------|-------------|------------------------|---------|-------------|
| sample | chr | pos       | gene     | ref | var                      | A       | C       | G       | T       | total   | vaf         | A                         | C       | G       | T       | total   | primary_vaf | Bayesian_NP | deepSNV pval           | met_vaf | Bayesian_NP |
| CO5    | 5   | 173035291 | BOD1     | G   | A                        | 64      | 39      | 5106    | 146     | 5355    | #####       | 37                        | 29      | 3322    | 102     | 3490    | 0.010601719 | 0.954       | 0.84657359             | 0.3     | 0.01        |
|        | 7   | 98554034  | TRRAP    | A   | G                        | 1445168 | 1008    | 318     | 302     | 1446796 | 0.000219796 | 1466151                   | 496     | 303     | 348     | 1467298 | 0.000206502 | 0.994       | 0.21665346             | 0.31    | 0           |
|        | 4   | 106755675 | GSTCD    | A   | G                        | 1500362 | 671     | 574     | 295     | 1501902 | 0.000382182 | 1632261                   | 868     | 422     | 352     | 1633903 | 0.000258277 | 0.993       | 1                      | 0.33    | 0           |
| sample | chr | pos       | gene     | ref | var                      | A       | C       | G       | T       | total   | vaf         | A                         | C       | G       | T       | total   | primary_vaf | Bayesian_NP | deepSNV pval           | met_vaf | Bayesian_NP |
| CO8    | 6   | 153345483 | RGS17    | A   | C                        | 3613    | 36      | 11      | 37      | 3697    | 0.009737625 | 5247                      | 49      | 32      | 52      | 5380    | 0.009107807 | 0.964       | 0.59657359             | 0.22    | 0.008       |
|        | 5   | 178140358 | ZNF354A  | A   | T                        | 821913  | 246     | 283     | 278     | 822720  | 0.000337904 | 785945                    | 259     | 260     | 298     | 786762  | 0.000378768 | 0.984       | 0.124077842            | 0.3     | 0           |
|        | 1   | 211192300 | KCNH1    | A   | C                        | 1921380 | 1481    | 731     | 416     | 1924008 | 0.000769747 | 2023907                   | 1193    | 631     | 325     | 2026056 | 0.000588829 | 0.998       | 0.345142699            | 0.34    | 0           |
|        | 5   | 106762962 | EGNA5    | G   | T                        | 334     | 66      | 1290095 | 548     | 1291043 | 0.000424463 | 519                       | 128     | 1838594 | 713     | 1839954 | 0.00038751  | 0.993       | 0.84657359             | 0.27    | 0           |
|        | 22  | 26898017  | TFIP11   | T   | A                        | 592     | 929     | 1192    | 1448993 | 1451706 | 0.000407796 | 508                       | 884     | 765     | 1232711 | 1234868 | 0.00041138  | 0.991       | 1                      | 0.45    | 0.024       |
|        | 2   | 11716651  | GREB1    | G   | C                        | 699     | 343     | 1636714 | 1299    | 1639055 | 0.000209267 | 560                       | 303     | 1218420 | 965     | 1220248 | 0.00024831  | 0.999       | 0.000689522            | 0.25    | 0           |
|        | 22  | 46930524  | CELSR1   | C   | T                        | 428     | 2007773 | 458     | 739     | 2009398 | 0.000367772 | 885                       | 1412564 | 455     | 627     | 1414531 | 0.000443256 | 0.997       | 0.341147711            | 0.33    | 0           |
|        | 5   | 127866348 | FBN2     | G   | T                        | 219     | 88      | 880028  | 295     | 880630  | 0.000334987 | 148                       | 60      | 495614  | 215     | 496037  | 0.000433435 | 0.989       | 0.838476316            | 0.36    | 0.001       |
|        | 12  | 25260947  | LRMP     | T   | A                        | 399     | 703     | 1706    | 1445118 | 1447926 | 0.000275567 | 464                       | 899     | 1619    | 1940018 | 1943000 | 0.000238806 | 0.977       | 0.512890212            | 0.32    | 0           |
|        | 14  | 20711786  | OR11H4   | T   | C                        | 141     | 203     | 232     | 1246055 | 1246631 | 0.000162839 | 126                       | 171     | 137     | 1125174 | 1125608 | 0.000151918 | 0.999       | 1                      | 0.38    | 0           |
|        | 2   | 128624549 | AMMECR1L | A   | G                        | 1767704 | 838     | 518     | 749     | 1769809 | 0.000292687 | 2565317                   | 1216    | 723     | 1247    | 2568503 | 0.000281487 | 0.996       | 1                      | 0.21    | 0           |
|        | 5   | 140573225 | PCDHB10  | T   | A                        | 308     | 662     | 1010    | 1521724 | 1523704 | 0.000202139 | 319                       | 413     | 696     | 1299987 | 1301415 | 0.000245118 | 0.996       | 0.499686185            | 0.4     | 0.001       |
|        | 6   | 18197451  | KDM1B    | A   | C                        | 2844026 | 2683    | 730     | 529     | 2847968 | 0.000942075 | 2771445                   | 1922    | 653     | 453     | 2774473 | 0.000692744 | 0.998       | 1                      | 0.22    | 0.002       |
|        | 16  | 31193877  | FUS      | C   | T                        | 1868    | 2704367 | 610     | 692     | 2707537 | 0.000255583 | 2042                      | 2658991 | 633     | 688     | 2662354 | 0.000258418 | 1           | 1                      | 0.29    | 0           |
|        | 8   | 55539448  | RP1      | A   | C                        | 1662490 | 377     | 402     | 241     | 1663510 | 0.000226629 | 530243                    | 80      | 126     | 75      | 530524  | 0.000150794 | 0.995       | 0.84657359             | 0.23    | 0.004       |
|        | X   | 114398248 | LRCH2    | T   | G                        | 43      | 71      | 68      | 371793  | 371975  | 0.000182808 | 24                        | 30      | 46      | 185557  | 185657  | 0.000247769 | 0.994       | 0.84657359             | 0.38    | 0           |
|        | 11  | 45671752  | CHST1    | G   | T                        | 858     | 1482    | 1437757 | 1213    | 1441310 | 0.000841595 | 358                       | 618     | 589642  | 678     | 591296  | 0.001146634 | 0.985       | 0.135600977            | 0.43    | 0           |
|        | 9   | 90321594  | DAPK1    | C   | T                        | 2035    | 3215837 | 1613    | 1235    | 3220720 | 0.000383455 | 1670                      | 2292808 | 1079    | 947     | 2296504 | 0.000412366 | 0.986       | 1                      | 0.3     | 0           |

**Supplementary Table 3 - Targeted deep-sequencing read counts of metastatic-specific mutations**

This table lists the reference and variant read counts for each nucleotide position in the primary tumor samples and matched normal tissue. The variant allele frequency was calculated using the nucleotide variant that was detected in the bulk exome sequencing data.

Supplementary Table 4.1

| Sample | Coverage Depth | Cov Breadth | Sample Type |
|--------|----------------|-------------|-------------|
| NC-pop | 216            | 0.9845      | population  |
| NL-pop | 127            | 0.9819      | population  |
| PD-pop | 179            | 0.9833      | population  |
| PA-pop | 162            | 0.9826      | population  |
| MD-pop | 224            | 0.9845      | population  |
| MA-pop | 213            | 0.9844      | population  |
| PD-13  | 108            | 0.9327      | single cell |
| PD-16  | 134            | 0.9574      | single cell |
| PD-19  | 97             | 0.9714      | single cell |
| PD-26  | 108            | 0.9525      | single cell |
| PD-27  | 110            | 0.9326      | single cell |
| PD-28  | 103            | 0.937       | single cell |
| PD-30  | 152            | 0.9634      | single cell |
| PD-31  | 126            | 0.972       | single cell |
| PD-32  | 132            | 0.9456      | single cell |
| PD-37  | 84             | 0.8984      | single cell |
| PD-38  | 131            | 0.9158      | single cell |
| PD-39  | 111            | 0.9504      | single cell |
| PD-40  | 266            | 0.9621      | single cell |
| PD-41  | 96             | 0.9398      | single cell |
| PD-42  | 1              | 0.4786      | single cell |
| PD-44  | 97             | 0.9703      | single cell |
| PA-50  | 243            | 0.9733      | single cell |
| PA-51  | 168            | 0.9592      | single cell |
| PA-52  | 116            | 0.9502      | single cell |
| PA-53  | 133            | 0.9541      | single cell |
| PA-54  | 127            | 0.953       | single cell |
| PA-56  | 165            | 0.9474      | single cell |
| PA-57  | 110            | 0.9164      | single cell |
| PA-61  | 159            | 0.9599      | single cell |
| PA-62  | 108            | 0.9547      | single cell |
| PA-63  | 162            | 0.9492      | single cell |
| PA-64  | 113            | 0.9552      | single cell |
| PA-65  | 163            | 0.9641      | single cell |
| PA-66  | 120            | 0.9501      | single cell |
| PA-70  | 147            | 0.9458      | single cell |
| PA-74  | 127            | 0.9519      | single cell |
| PA-75  | 117            | 0.9549      | single cell |
| PA-76  | 139            | 0.9565      | single cell |
| PA-77  | 148            | 0.9516      | single cell |
| PA-78  | 119            | 0.9569      | single cell |
| PA-80  | 107            | 0.9495      | single cell |
| PA-81  | 156            | 0.9365      | single cell |
| PA-83  | 143            | 0.9581      | single cell |
| PA-85  | 129            | 0.9468      | single cell |
| PA-86  | 127            | 0.7879      | single cell |
| PA-87  | 159            | 0.9622      | single cell |
| PA-88  | 132            | 0.9557      | single cell |
| PA-89  | 135            | 0.9512      | single cell |
| PA-90  | 155            | 0.9575      | single cell |
| PA-91  | 120            | 0.9613      | single cell |
| MD-1   | 154            | 0.891       | single cell |
| MD-2   | 168            | 0.9631      | single cell |
| MD-3   | 135            | 0.9545      | single cell |
| MD-4   | 147            | 0.9531      | single cell |
| MD-5   | 148            | 0.9531      | single cell |
| MD-6   | 120            | 0.9587      | single cell |
| MD-7   | 155            | 0.9665      | single cell |
| MD-8   | 133            | 0.9343      | single cell |
| MD-9   | 147            | 0.961       | single cell |
| MD-10  | 174            | 0.9539      | single cell |
| MD-13  | 154            | 0.9548      | single cell |
| MD-14  | 168            | 0.9515      | single cell |
| MD-15  | 131            | 0.9599      | single cell |
| MD-16  | 165            | 0.9639      | single cell |
| MD-19  | 150            | 0.9562      | single cell |
| MD-20  | 150            | 0.9561      | single cell |
| MD-21  | 150            | 0.9575      | single cell |
| MD-22  | 140            | 0.9578      | single cell |
| MD-23  | 141            | 0.9187      | single cell |
| MD-25  | 161            | 0.9665      | single cell |
| MA-49  | 152            | 0.9632      | single cell |
| MA-50  | 160            | 0.9701      | single cell |
| MA-51  | 138            | 0.9653      | single cell |
| MA-52  | 126            | 0.952       | single cell |
| MA-53  | 152            | 0.9639      | single cell |
| MA-54  | 169            | 0.9644      | single cell |
| MA-55  | 160            | 0.9641      | single cell |
| MA-56  | 162            | 0.9674      | single cell |
| MA-57  | 152            | 0.9649      | single cell |
| MA-58  | 146            | 0.9631      | single cell |
| MA-59  | 165            | 0.9695      | single cell |
| MA-61  | 156            | 0.9615      | single cell |
| MA-62  | 164            | 0.9629      | single cell |
| MA-63  | 168            | 0.9616      | single cell |
| MA-64  | 144            | 0.9631      | single cell |
| MA-65  | 161            | 0.9508      | single cell |
| MA-66  | 182            | 0.9653      | single cell |
| MA-67  | 144            | 0.9626      | single cell |
| MA-68  | 159            | 0.9664      | single cell |
| MA-69  | 160            | 0.9681      | single cell |
| MA-73  | 149            | 0.9663      | single cell |
| MA-74  | 115            | 0.9629      | single cell |
| MA-75  | 133            | 0.9651      | single cell |
| MA-76  | 154            | 0.9628      | single cell |
| MA-77  | 134            | 0.9596      | single cell |
| PDD-1  | 140            | 0.8984      | single cell |
| PDD-2  | 136            | 0.9433      | single cell |

|        |     |        |             |
|--------|-----|--------|-------------|
| PDD-3  | 140 | 0.939  | single cell |
| PDD-4  | 119 | 0.9404 | single cell |
| PDD-5  | 154 | 0.956  | single cell |
| PDD-6  | 166 | 0.9331 | single cell |
| PDD-7  | 144 | 0.9529 | single cell |
| PDD-8  | 148 | 0.9488 | single cell |
| PDD-9  | 146 | 0.9488 | single cell |
| PDD-10 | 141 | 0.9522 | single cell |
| PDD-11 | 154 | 0.9533 | single cell |
| PDD-12 | 152 | 0.9442 | single cell |
| PDD-13 | 165 | 0.9465 | single cell |
| PDD-14 | 147 | 0.941  | single cell |
| PDD-15 | 171 | 0.9556 | single cell |
| PDD-16 | 87  | 0.9343 | single cell |
| PDD-17 | 144 | 0.9448 | single cell |
| PDD-18 | 122 | 0.9227 | single cell |
| PDD-19 | 145 | 0.9435 | single cell |
| PDD-20 | 128 | 0.9396 | single cell |
| PDD-21 | 3   | 0.7138 | single cell |
| PDD-22 | 153 | 0.9463 | single cell |
| PDD-23 | 289 | 0.9703 | single cell |
| PDD-24 | 109 | 0.929  | single cell |
| PDD-25 | 162 | 0.9482 | single cell |
| PDD-26 | 163 | 0.9474 | single cell |
| PDD-27 | 289 | 0.966  | single cell |
| PDD-28 | 124 | 0.8906 | single cell |
| PDD-29 | 2   | 0.6277 | single cell |
| PDD-30 | 142 | 0.9437 | single cell |
| PDD-31 | 136 | 0.9485 | single cell |
| PDD-32 | 154 | 0.9561 | single cell |
| PDD-33 | 140 | 0.9521 | single cell |
| PDD-34 | 173 | 0.9568 | single cell |
| PDD-35 | 170 | 0.9516 | single cell |
| PDD-36 | 155 | 0.945  | single cell |
| PDD-37 | 130 | 0.9379 | single cell |
| PDD-38 | 121 | 0.8928 | single cell |
| PDD-39 | 171 | 0.9535 | single cell |
| PDD-40 | 122 | 0.9455 | single cell |
| PDD-41 | 125 | 0.9452 | single cell |
| PDD-42 | 111 | 0.9434 | single cell |
| PDD-43 | 147 | 0.9492 | single cell |
| PDD-44 | 135 | 0.9421 | single cell |
| PDD-45 | 151 | 0.9457 | single cell |
| PDD-46 | 143 | 0.9528 | single cell |
| PDD-47 | 127 | 0.9263 | single cell |
| PDD-48 | 125 | 0.9338 | single cell |
| PDD-49 | 143 | 0.9504 | single cell |
| PDD-50 | 165 | 0.9532 | single cell |
| PDD-51 | 145 | 0.9541 | single cell |
| PDD-52 | 139 | 0.9388 | single cell |
| PDD-53 | 146 | 0.9505 | single cell |
| PDD-54 | 117 | 0.9409 | single cell |
| PDD-55 | 129 | 0.9456 | single cell |
| PDD-56 | 120 | 0.9448 | single cell |
| PDD-57 | 141 | 0.9356 | single cell |
| PDD-58 | 118 | 0.9091 | single cell |
| PDD-59 | 123 | 0.9256 | single cell |
| PDD-60 | 133 | 0.9339 | single cell |
| PDD-61 | 138 | 0.948  | single cell |
| PDD-62 | 146 | 0.9271 | single cell |
| PDD-63 | 171 | 0.9431 | single cell |
| PDD-64 | 60  | 0.9258 | single cell |
| PDD-65 | 155 | 0.9517 | single cell |
| PDD-66 | 143 | 0.9517 | single cell |
| PDD-67 | 169 | 0.9497 | single cell |
| PDD-68 | 183 | 0.9517 | single cell |
| PDD-69 | 177 | 0.9514 | single cell |
| PDD-70 | 156 | 0.9328 | single cell |
| PDD-71 | 149 | 0.9511 | single cell |
| PDD-72 | 149 | 0.9448 | single cell |
| PDD-73 | 170 | 0.9585 | single cell |
| PDD-74 | 139 | 0.9352 | single cell |
| PDD-75 | 76  | 0.925  | single cell |
| PDD-76 | 145 | 0.9543 | single cell |
| PDD-77 | 181 | 0.9494 | single cell |
| PDD-78 | 133 | 0.9254 | single cell |
| PDD-79 | 158 | 0.9557 | single cell |
| PDD-80 | 76  | 0.6989 | single cell |
| PDD-81 | 72  | 0.7596 | single cell |
| PDD-82 | 122 | 0.9169 | single cell |
| PDD-83 | 121 | 0.9357 | single cell |
| PDD-84 | 164 | 0.9479 | single cell |
| PDD-85 | 178 | 0.9591 | single cell |
| PDD-86 | 125 | 0.9439 | single cell |
| PDD-87 | 107 | 0.9439 | single cell |
| PDD-88 | 110 | 0.9434 | single cell |
| PDD-89 | 93  | 0.9313 | single cell |
| PDD-90 | 87  | 0.9395 | single cell |
| PDD-91 | 112 | 0.9447 | single cell |
| PDD-92 | 96  | 0.932  | single cell |
| PDD-93 | 84  | 0.9216 | single cell |
| PDD-94 | 109 | 0.9184 | single cell |
| PDD-95 | 63  | 0.6785 | single cell |
| PDD-96 | 2   | 0.6465 | single cell |

Supplementary Table 4.2

| Sample | Coverage Depth | Cov Breadth | Sample Type |
|--------|----------------|-------------|-------------|
| NC-pop | 127            | 0.9808      | population  |
| NL-pop | 103            | 0.9803      | population  |
| PD-pop | 109            | 0.9812      | population  |
| PA-pop | 105            | 0.981       | population  |
| MD-pop | 27             | 0.8479      | population  |
| MA-pop | 132            | 0.9803      | population  |
| PD-1   | 671            | 0.9801      | single cell |
| PD-5   | 115            | 0.8786      | single cell |
| PD-7   | 103            | 0.8334      | single cell |
| PD-8   | 104            | 0.8734      | single cell |
| PD-9   | 130            | 0.8708      | single cell |
| PD-14  | 115            | 0.882       | single cell |
| PD-16  | 191            | 0.9286      | single cell |
| PD-17  | 123            | 0.8624      | single cell |
| PD-18  | 175            | 0.912       | single cell |
| PD-20  | 103            | 0.8476      | single cell |
| PA-26  | 133            | 0.9193      | single cell |
| PA-27  | 123            | 0.924       | single cell |
| PA-28  | 173            | 0.9299      | single cell |
| PA-29  | 114            | 0.9147      | single cell |
| PA-31  | 1              | 0.441       | single cell |
| PA-32  | 118            | 0.9223      | single cell |
| PA-38  | 325            | 0.9688      | single cell |
| PA-39  | 124            | 0.9311      | single cell |
| PA-40  | 148            | 0.9304      | single cell |
| PA-41  | 145            | 0.9251      | single cell |
| PA-42  | 131            | 0.9162      | single cell |
| PA-43  | 149            | 0.9223      | single cell |
| PA-46  | 125            | 0.9118      | single cell |
| PA-47  | 144            | 0.9457      | single cell |
| PA-48  | 159            | 0.931       | single cell |
| PA-49  | 158            | 0.9205      | single cell |
| PA-51  | 128            | 0.9412      | single cell |
| PA-52  | 160            | 0.9402      | single cell |
| PA-53  | 157            | 0.9359      | single cell |
| PA-54  | 145            | 0.9266      | single cell |
| PA-55  | 124            | 0.9408      | single cell |
| PA-57  | 179            | 0.936       | single cell |
| PA-58  | 142            | 0.9342      | single cell |
| PA-59  | 127            | 0.9153      | single cell |
| PA-61  | 123            | 0.9214      | single cell |
| PA-62  | 114            | 0.9242      | single cell |
| PA-63  | 166            | 0.9403      | single cell |
| PA-64  | 147            | 0.9384      | single cell |
| PA-65  | 167            | 0.9397      | single cell |
| PA-68  | 133            | 0.9376      | single cell |
| PA-70  | 208            | 0.9498      | single cell |
| PA-71  | 145            | 0.946       | single cell |
| PA-73  | 119            | 0.9227      | single cell |
| PA-74  | 166            | 0.9435      | single cell |
| PA-77  | 151            | 0.939       | single cell |
| MD-3   | 75             | 0.8073      | single cell |
| MD-4   | 66             | 0.8225      | single cell |
| MD-5   | 74             | 0.8005      | single cell |
| MD-7   | 61             | 0.8173      | single cell |
| MD-8   | 67             | 0.8226      | single cell |
| MD-9   | 76             | 0.8369      | single cell |
| MD-10  | 135            | 0.9078      | single cell |
| MD-11  | 135            | 0.8899      | single cell |
| MD-12  | 149            | 0.9232      | single cell |
| MD-13  | 151            | 0.9075      | single cell |
| MA-25  | 145            | 0.9058      | single cell |
| MA-26  | 144            | 0.8986      | single cell |
| MA-27  | 125            | 0.9264      | single cell |
| MA-28  | 119            | 0.9432      | single cell |
| MA-29  | 124            | 0.929       | single cell |
| MA-30  | 142            | 0.9448      | single cell |
| MA-31  | 314            | 0.9645      | single cell |
| MA-32  | 142            | 0.9459      | single cell |
| MA-33  | 115            | 0.9346      | single cell |
| MA-34  | 164            | 0.9461      | single cell |
| MA-35  | 155            | 0.9374      | single cell |
| MA-36  | 165            | 0.9487      | single cell |
| MA-37  | 130            | 0.9203      | single cell |
| MA-38  | 133            | 0.8998      | single cell |
| MA-39  | 171            | 0.9334      | single cell |
| MA-40  | 148            | 0.9364      | single cell |
| MA-41  | 132            | 0.9154      | single cell |
| MA-42  | 180            | 0.9281      | single cell |
| MA-43  | 129            | 0.9222      | single cell |
| MA-44  | 150            | 0.9428      | single cell |
| MA-45  | 148            | 0.9313      | single cell |
| MA-46  | 151            | 0.9219      | single cell |
| MA-47  | 162            | 0.9283      | single cell |
| MA-48  | 154            | 0.9463      | single cell |
| MA-85  | 118            | 0.9252      | single cell |
| MA-86  | 143            | 0.9418      | single cell |
| MA-87  | 147            | 0.9322      | single cell |
| MA-88  | 139            | 0.928       | single cell |
| MA-89  | 114            | 0.9448      | single cell |
| MA-90  | 148            | 0.9464      | single cell |
| MA-91  | 139            | 0.9473      | single cell |
| MA-92  | 124            | 0.9124      | single cell |
| MA-93  | 112            | 0.9138      | single cell |
| MA-94  | 122            | 0.9208      | single cell |
| MA-95  | 121            | 0.9189      | single cell |
| PDD-1  | 151            | 0.917       | single cell |
| PDD-2  | 127            | 0.9418      | single cell |

|        |     |        |             |
|--------|-----|--------|-------------|
| PDD-3  | 144 | 0.9524 | single cell |
| PDD-4  | 183 | 0.9564 | single cell |
| PDD-5  | 188 | 0.9571 | single cell |
| PDD-6  | 160 | 0.9537 | single cell |
| PDD-7  | 148 | 0.9572 | single cell |
| PDD-8  | 133 | 0.9531 | single cell |
| PDD-9  | 162 | 0.954  | single cell |
| PDD-10 | 113 | 0.9349 | single cell |
| PDD-11 | 119 | 0.9384 | single cell |
| PDD-12 | 138 | 0.9486 | single cell |
| PDD-13 | 10  | 0.8517 | single cell |
| PDD-14 | 139 | 0.9482 | single cell |
| PDD-15 | 163 | 0.8968 | single cell |
| PDD-16 | 88  | 0.9274 | single cell |
| PDD-17 | 145 | 0.9472 | single cell |
| PDD-18 | 129 | 0.9464 | single cell |
| PDD-19 | 167 | 0.951  | single cell |
| PDD-20 | 164 | 0.9555 | single cell |
| PDD-21 | 2   | 0.4965 | single cell |
| PDD-22 | 160 | 0.9533 | single cell |
| PDD-23 | 350 | 0.9698 | single cell |
| PDD-24 | 136 | 0.9463 | single cell |
| PDD-25 | 115 | 0.9545 | single cell |
| PDD-26 | 147 | 0.9482 | single cell |
| PDD-27 | 230 | 0.9696 | single cell |
| PDD-28 | 110 | 0.9292 | single cell |
| PDD-29 | 0   | 0.266  | single cell |
| PDD-30 | 121 | 0.9397 | single cell |
| PDD-31 | 89  | 0.833  | single cell |
| PDD-32 | 162 | 0.9505 | single cell |
| PDD-33 | 158 | 0.9371 | single cell |
| PDD-34 | 160 | 0.9542 | single cell |
| PDD-35 | 160 | 0.9558 | single cell |
| PDD-36 | 135 | 0.9484 | single cell |
| PDD-37 | 145 | 0.9548 | single cell |
| PDD-38 | 128 | 0.9469 | single cell |
| PDD-39 | 165 | 0.9566 | single cell |
| PDD-40 | 154 | 0.9483 | single cell |
| PDD-41 | 124 | 0.9514 | single cell |
| PDD-42 | 134 | 0.9516 | single cell |
| PDD-43 | 115 | 0.9446 | single cell |
| PDD-44 | 155 | 0.955  | single cell |
| PDD-45 | 197 | 0.9565 | single cell |
| PDD-46 | 151 | 0.9518 | single cell |
| PDD-47 | 127 | 0.9432 | single cell |
| PDD-48 | 172 | 0.9533 | single cell |
| PDD-49 | 125 | 0.936  | single cell |
| PDD-50 | 166 | 0.9516 | single cell |
| PDD-51 | 151 | 0.933  | single cell |
| PDD-52 | 167 | 0.9401 | single cell |
| PDD-53 | 115 | 0.9413 | single cell |
| PDD-54 | 86  | 0.9211 | single cell |
| PDD-55 | 112 | 0.9384 | single cell |
| PDD-56 | 112 | 0.914  | single cell |
| PDD-57 | 115 | 0.9415 | single cell |
| PDD-58 | 158 | 0.9518 | single cell |
| PDD-59 | 124 | 0.9378 | single cell |
| PDD-60 | 15  | 0.88   | single cell |
| PDD-61 | 133 | 0.944  | single cell |
| PDD-62 | 143 | 0.9429 | single cell |
| PDD-63 | 143 | 0.9276 | single cell |
| PDD-64 | 118 | 0.9386 | single cell |
| PDD-65 | 165 | 0.9451 | single cell |
| PDD-66 | 121 | 0.7515 | single cell |
| PDD-67 | 135 | 0.8572 | single cell |
| PDD-68 | 166 | 0.9536 | single cell |
| PDD-69 | 135 | 0.9489 | single cell |
| PDD-70 | 115 | 0.9211 | single cell |
| PDD-71 | 129 | 0.9493 | single cell |
| PDD-72 | 137 | 0.931  | single cell |
| PDD-73 | 118 | 0.9426 | single cell |
| PDD-74 | 145 | 0.9484 | single cell |
| PDD-75 | 147 | 0.9131 | single cell |
| PDD-76 | 132 | 0.9339 | single cell |
| PDD-77 | 116 | 0.9453 | single cell |
| PDD-78 | 152 | 0.9408 | single cell |
| PDD-79 | 163 | 0.9454 | single cell |
| PDD-80 | 151 | 0.9512 | single cell |
| PDD-81 | 146 | 0.9455 | single cell |
| PDD-82 | 166 | 0.9458 | single cell |
| PDD-83 | 129 | 0.9382 | single cell |
| PDD-84 | 109 | 0.9146 | single cell |
| PDD-85 | 129 | 0.9198 | single cell |
| PDD-86 | 145 | 0.9334 | single cell |
| PDD-87 | 97  | 0.9233 | single cell |
| PDD-88 | 119 | 0.9308 | single cell |
| PDD-89 | 82  | 0.9125 | single cell |
| PDD-90 | 102 | 0.9138 | single cell |
| PDD-91 | 108 | 0.9374 | single cell |
| PDD-92 | 118 | 0.9329 | single cell |
| PDD-93 | 89  | 0.9183 | single cell |
| PDD-94 | 76  | 0.9165 | single cell |
| PDD-95 | 86  | 0.9298 | single cell |
| PDD-96 | 134 | 0.8979 | single cell |

**Supplementary Table 4 – Single Cell Mutational Data Coverage Metrics**

Coverage depth and breadth metrics for the single cell and bulk exome samples sequenced from patient CRC1 (ST4.1) and patient CRC2 (ST4.2). Cells highlighted in red were excluded from analysis by QC due to insufficient coverage.

**Supplementary Table 5.1**

| chromosome | position  | genes   | primary exome allele frequency | primary single cell frequency |
|------------|-----------|---------|--------------------------------|-------------------------------|
| chr5       | 112175303 | APC     | 0.56                           | 0.93                          |
| chr10      | 114911615 | TCF7L2  | 0.30                           | 0.86                          |
| chr11      | 92600167  | FAT3    | 0.31                           | 0.64                          |
| chr11      | 111249887 | POU2AF1 | 0.20                           | 0.64                          |
| chr12      | 25398285  | KRAS    | 0.44                           | 0.64                          |
| chr19      | 30313229  | CCNE1   | 0.30                           | 0.79                          |
| chr22      | 39629508  | MYH9    | 0.22                           | 0.29                          |

| chromosome | position  | genes   | metastasis exome allele frequency | metastasis single cell frequency |
|------------|-----------|---------|-----------------------------------|----------------------------------|
| chr5       | 112175303 | APC     | 0.94                              | 1.00                             |
| chr10      | 114911615 | TCF7L2  | 0.33                              | 0.80                             |
| chr11      | 92600167  | FAT3    | 0.42                              | 0.68                             |
| chr11      | 111249887 | POU2AF1 | 0.42                              | 0.72                             |
| chr12      | 25398285  | KRAS    | 0.68                              | 0.80                             |
| chr19      | 30313229  | CCNE1   | 0.25                              | 0.80                             |
| chr22      | 39629508  | MYH9    | 0.34                              | 0.64                             |
| chrX       | 48650491  | GATA1   | 0.28                              | 0.64                             |
| chr7       | 98554034  | TRRAP   | 0.31                              | 0.84                             |
| chr18      | 22807094  | ZNF521  | 0.43                              | 0.96                             |

**Supplementary Table 5.2**

| chromosomes | positions | genes | primary exome allele frequency | primary single cell frequency |
|-------------|-----------|-------|--------------------------------|-------------------------------|
| chr1        | 115258747 | NRAS  | 0.96                           | 0.85                          |
| chr2        | 37105068  | STRN  | 0.33                           | 0.79                          |
| chr5        | 112164646 | APC   | 0.58                           | 0.56                          |
| chr5        | 112175328 | APC   | 0.34                           | 0.56                          |
| chr8        | 59851979  | TOX   | 0.4                            | 0.68                          |
| chr12       | 58144548  | CDK4  | 0.68                           | 0.76                          |
| chr16       | 15917267  | MYH11 | 0.54                           | 0.71                          |
| chr16       | 27448836  | IR21R | 0.58                           | 0.71                          |
| chr17       | 7577548   | TP53  | 0.88                           | 0.82                          |
| chr22       | 28193785  | MN1   | 0.48                           | 0.82                          |

| chromosomes | positions | genes | metastasis exome allele frequency | metastasis single cell frequency |
|-------------|-----------|-------|-----------------------------------|----------------------------------|
| chr1        | 16258997  | SPEN  | 0.14                              | 0.26                             |
| chr1        | 115258747 | NRAS  | 0.89                              | 0.95                             |
| chr2        | 37105068  | STRN  | 0.69                              | 0.36                             |
| chr5        | 112164646 | APC   | 0.54                              | 0.63                             |
| chr5        | 112175328 | APC   | 0.46                              | 0.38                             |
| chr8        | 59851979  | TOX   | 0.80                              | 0.33                             |
| chr12       | 58144548  | CDK4  | 0.69                              | 0.66                             |
| chr16       | 15917267  | MYH11 | 0.57                              | 0.37                             |
| chr16       | 27448836  | IR21R | 0.69                              | 0.68                             |
| chr16       | 31193877  | FUS   | 0.57                              | 0.29                             |
| chr17       | 7577548   | TP53  | 0.80                              | 1.00                             |
| chr22       | 28193785  | MN1   | 0.43                              | 0.25                             |
| chrX        | 154157378 | F8    | 0.17                              | 0.30                             |

**Supplementary Table 5 – Mutational concordance of bulk exome and single cell mutation frequencies**

For the mutations that are covered with targeted probes in both the population exome platform and single cell T1000 platform in patients CO5 (ST5.1) and CO8 (ST5.2) we calculated and compared the mutation frequencies in this table.
