# Supplementary material for: Single-cell DNA sequencing reveals a late-dissemination model in metastatic colorectal cancer
Source: HighWire-hosted journal article supplement (doi:10.1101/gr.209973.116), 2017-05-25
Supplement: Supplemental__Scripts.zip [file mark_errors.pdf › Supplemental__Scripts/fp_fn/mark_errors.pdf]

# Marking errors

Alexander Davis

February 24, 2017

## Contents

|          |                                                                                                     |           |
|----------|-----------------------------------------------------------------------------------------------------|-----------|
| <b>1</b> | <b>Code to load data matrices and generate theoretical genotype matrices</b>                        | <b>1</b>  |
| <b>2</b> | <b>Visualizing the genotype matrices</b>                                                            | <b>3</b>  |
| <b>3</b> | <b>Checking correctness of genotype matrices</b>                                                    | <b>4</b>  |
| <b>4</b> | <b>Overlaying data matrices and genotype matrices to obtain false positives and false negatives</b> | <b>5</b>  |
| <b>5</b> | <b>Making a figure</b>                                                                              | <b>7</b>  |
| <b>6</b> | <b>Estimates of error rates</b>                                                                     | <b>10</b> |
| 6.1      | False negative rate . . . . .                                                                       | 10        |
| 6.1.1    | CO5 . . . . .                                                                                       | 11        |
| 6.1.2    | CO8 . . . . .                                                                                       | 11        |
| 6.2      | Rate of mutation not seen . . . . .                                                                 | 11        |
| 6.2.1    | CO5 . . . . .                                                                                       | 11        |
| 6.2.2    | CO8 . . . . .                                                                                       | 11        |
| 6.3      | False positive rate . . . . .                                                                       | 11        |
| 6.3.1    | CO5 . . . . .                                                                                       | 11        |
| 6.3.2    | CO8 . . . . .                                                                                       | 12        |
| 6.4      | False discovery rate . . . . .                                                                      | 12        |
| 6.4.1    | CO5 . . . . .                                                                                       | 12        |
| 6.4.2    | CO8 . . . . .                                                                                       | 12        |

## 1 Code to load data matrices and generate theoretical genotype matrices

```
> library(sna)
> library(stringr)
> library(igraph)
```

```

> library(gplots)
> # Load data from Marco
> co5.master.mat <- read.table('.././data/C05/C05.master_matrix.txt')
> co8.master.mat <- read.table('.././data/C08/C08.master_matrix.txt')
> # Remove population columns
> co5.data.mat <- co5.master.mat[, -(1:6)]
> co8.data.mat <- co8.master.mat[, -(1:5)]
> # Load trees
> read.dot.tree <- function(path)
+ {
+   dot.file <- readLines(path)
+   read.dot(textConnection(str_replace_all(
+     dot.file, '[ ;]', '')))
+ }
> co5.adjmat <- read.dot.tree("C05_m10.renamed.gv")
> co8.adjmat <- read.dot.tree("C08_m10.renamed.gv")
> co5.tree <- graph_from_adjacency_matrix(co5.adjmat)
> co8.tree <- graph_from_adjacency_matrix(co8.adjmat)
> # Make theoretical genotype matrix
> genotype.matrix <- function(adjmat, tree)
+ {
+   # Figure out which nodes are root, cells, and mutations
+   root.index <- which(colnames(adjmat)=="Root")
+   stopifnot(length(root.index)==1)
+   cell.indices <- grep("[MP][A-Z0-9]*_\\d*$", colnames(adjmat))
+   mut.indices <- (1:ncol(adjmat))[! 1:ncol(adjmat) %in% c(root.index, cell.indices)]
+   # Find paths from root
+   paths <- shortest_paths(tree, root.index, cell.indices)$vpath
+   # Express paths as the numbers of mutations
+   # (counting first mutation as 1, second as 2, etc)
+   path.interiors <- lapply(paths,
+     function(x) if(length(x)>2) {return(x[2:(length(x)-1)])} else {return(integer(0))})
+   path.mut.numbers <- sapply(path.interiors,
+     function(xs) as.integer(sapply(xs, function(x) which(mut.indices==x)[1])))
+   # Produce genotype matrix
+   # (in each row: a 1 for a mutation in the path, 0 otherwise)
+   gm <- t(sapply(path.mut.numbers,
+     function(p) {row<-rep(0,length(mut.indices)); row[p]<-1; return(row)}))
+   colnames(gm) <- colnames(adjmat)[mut.indices]
+   rownames(gm) <- colnames(adjmat)[cell.indices]
+   return(gm)
+ }
> co5.gm <- genotype.matrix(co5.adjmat, co5.tree)
> co8.gm <- genotype.matrix(co8.adjmat, co8.tree)

```

## 2 Visualizing the genotype matrices

```
> view.mat <- function(mat, ...)
+ {
+   clustered.mat <- mat[hclust(dist(mat))$order, hclust(dist(t(mat)))$order]
+   image(t(clustered.mat[nrow(mat):1,]), axes=FALSE, ...)
+ }
> view.mat(co5.gm)
```

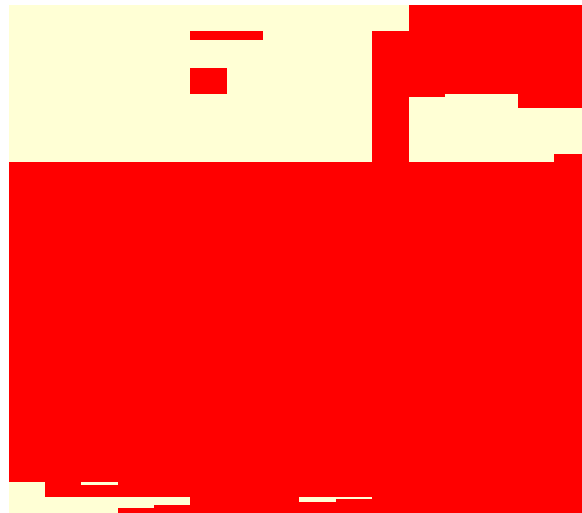

What are those weird cells on the bottom with just a few mutations? Oh, those would be cells up near the neck of the tumor tree. Weird cells.

```
> view.mat(co8.gm)
```

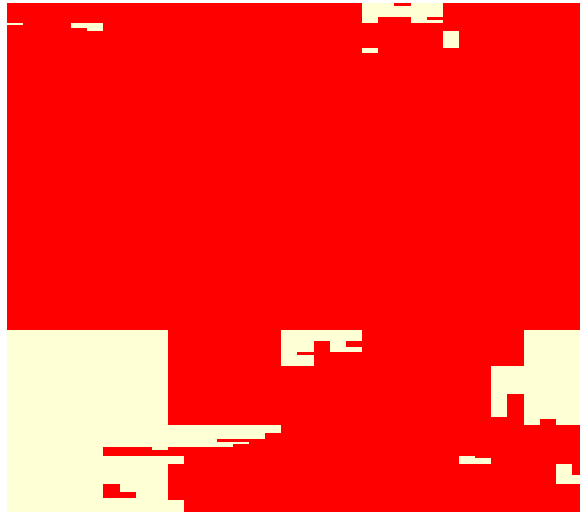

### 3 Checking correctness of genotype matrices

Checking that these are correct. In CO5, TMP4 should be in 9 cells. GATA1 should be in 16 cells, all of which have POU2AF1 and not PM4.

```
> sum(co5.gm[, 'TMP4'])
[1] 9

> sum(co5.gm[, 'GATA1'])
[1] 16

> sum(co5.gm[, 'GATA1']==1 & co5.gm[, 'POU2AF1']==1)
[1] 16

> sum(co5.gm[, 'GATA1']==1 & co5.gm[, 'TMP4']==1)
[1] 0
```

In CO8, ALK is in 9 cells, of which 4 also have SPEN. NR4A3 is in 13 cells, of which 4 also have TSHZ3.

```

> sum(co8.gm[, "ALK_chr2_29416591"])
[1] 9
> sum(co8.gm[, "SPEN_chr1_16202934"])
[1] 4
> sum(co8.gm[, "ALK_chr2_29416591"] & co8.gm[, "SPEN_chr1_16202934"]==1)
[1] 4
> sum(co8.gm[, 'NR4A3_chr9_102595561'])
[1] 13
> sum(co8.gm[, "TSHZ3_chr19_31768568"])
[1] 4
> sum(co8.gm[, 'NR4A3_chr9_102595561']==1 & co8.gm[, "TSHZ3_chr19_31768568"]==1)
[1] 4

```

## 4 Overlaying data matrices and genotype matrices to obtain false positives and false negatives

```

> co5.dm <- t(co5.data.mat)
> rownames(co5.dm) <- str_replace_all(rownames(co5.dm), "[:.-]", "_")
> colnames(co5.dm) <- str_extract(colnames(co5.dm), "~[A-Z0-9]+")
> co5.gm.aligned <- co5.gm[rownames(co5.dm), colnames(co5.dm)]
> co5.dm["PD_41",]

```

| POU2AF1 | CCNE1 | MYH9   | TCF7L2 | KRAS   | APC  | TP53 | FAT3 | ROBO2 | TDRP |
|---------|-------|--------|--------|--------|------|------|------|-------|------|
| 0.0     | 0.0   | 0.0    | 0.0    | 0.5    | 1.0  | 0.0  | 0.0  | 0.0   | 0.0  |
| EYS     | GATA1 | RBFOX1 | TRRAP  | ZNF521 | TPM4 |      |      |       |      |
| 0.0     | 0.0   | 0.0    | 0.0    | 0.0    | 0.0  |      |      |       |      |

```

> co5.gm.aligned["PD_41",]

```

| POU2AF1 | CCNE1 | MYH9   | TCF7L2 | KRAS   | APC  | TP53 | FAT3 | ROBO2 | TDRP |
|---------|-------|--------|--------|--------|------|------|------|-------|------|
| 0       | 0     | 0      | 0      | 0      | 1    | 0    | 0    | 0     | 0    |
| EYS     | GATA1 | RBFOX1 | TRRAP  | ZNF521 | TPM4 |      |      |       |      |
| 0       | 0     | 0      | 0      | 0      | 0    |      |      |       |      |

```

> which(rownames(co5.dm)=="PD_41")
[1] 87

```

```

> co5.pairs <- outer(1:nrow(co5.dm), 1:ncol(co5.dm),
+   Vectorize(function(i,j) sprintf("%s,%s",co5.dm[i,j],co5.gm.aligned[i,j])))
> colnames(co5.pairs) <- colnames(co5.dm)
> rownames(co5.pairs) <- rownames(co5.dm)
> co5.pairs[87,]

```

| POU2AF1 | CCNE1 | MYH9   | TCF7L2 | KRAS    | APC   | TP53  | FAT3  | ROBO2 | TDRP  |
|---------|-------|--------|--------|---------|-------|-------|-------|-------|-------|
| "0,0"   | "0,0" | "0,0"  | "0,0"  | "0.5,0" | "1,1" | "0,0" | "0,0" | "0,0" | "0,0" |
| EYS     | GATA1 | RBFOX1 | TRRAP  | ZNF521  | TPM4  |       |       |       |       |
| "0,0"   | "0,0" | "0,0"  | "0,0"  | "0,0"   | "0,0" |       |       |       |       |

```

> co5.pairs["PD_41",]

```

| POU2AF1 | CCNE1 | MYH9   | TCF7L2 | KRAS    | APC   | TP53  | FAT3  | ROBO2 | TDRP  |
|---------|-------|--------|--------|---------|-------|-------|-------|-------|-------|
| "0,0"   | "0,0" | "0,0"  | "0,0"  | "0.5,0" | "1,1" | "0,0" | "0,0" | "0,0" | "0,0" |
| EYS     | GATA1 | RBFOX1 | TRRAP  | ZNF521  | TPM4  |       |       |       |       |
| "0,0"   | "0,0" | "0,0"  | "0,0"  | "0,0"   | "0,0" |       |       |       |       |

```

> heatmap.2(matrix(as.numeric(as.factor(co5.pairs)), ncol=ncol(co5.pairs)), col=rainbow(6))
> levels(as.factor(co5.pairs))

```

```

[1] "0,0" "0,1" "0.5,0" "0.5,1" "1,0" "1,1"

```

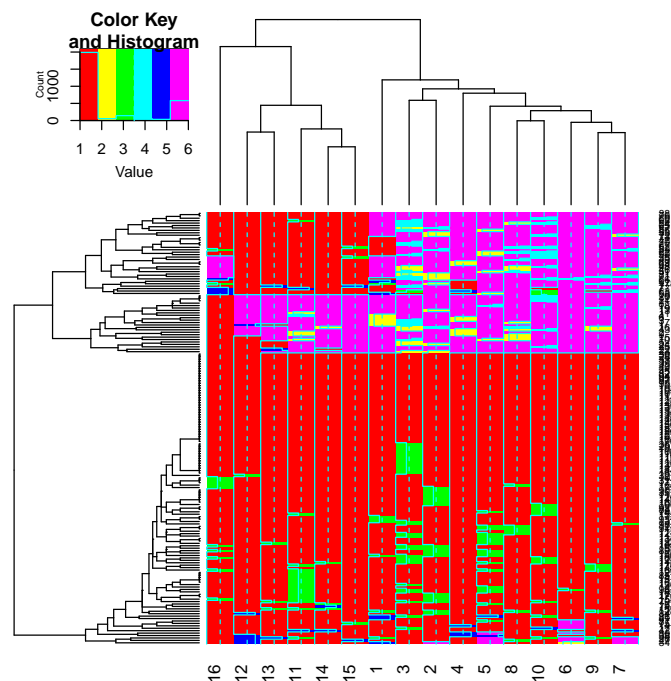

```

> co8.dm <- t(co8.data.mat)
> rownames(co8.dm) <- str_replace_all(rownames(co8.dm), "[:.-]", "_")
> colnames(co8.dm) <- str_replace_all(colnames(co8.dm), "[:.-]", "_")
> co8.gm.aligned <- co8.gm[rownames(co8.dm), colnames(co8.dm)]
> co8.pairs <- outer(1:nrow(co8.dm), 1:ncol(co8.dm),
+   Vectorize(function(i,j) sprintf("%s,%s", co8.dm[i,j], co8.gm.aligned[i,j])))
> colnames(co8.pairs) <- colnames(co8.dm)
> rownames(co8.pairs) <- rownames(co8.dm)
> heatmap.2(matrix(as.numeric(as.factor(co8.pairs))), ncol=ncol(co8.pairs), col=rainbow(6))
> levels(as.factor(co8.pairs))

```

```
[1] "0,0" "0,1" "0.5,0" "0.5,1" "1,0" "1,1"
```

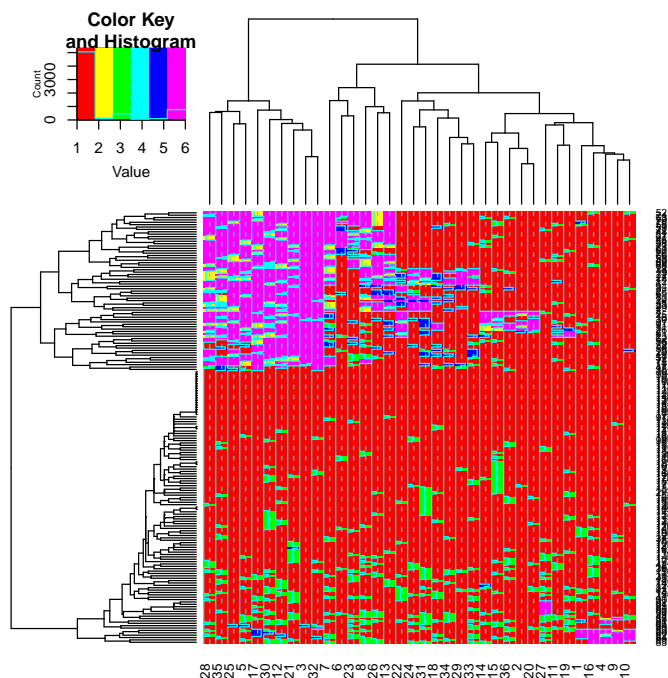

## 5 Making a figure

```

> convert <- function(x) switch(x, "1,0"="FP",
+   "0,1"="FN",
+   "0.5,0"="Missing (no mutation)",
+   "0.5,1"="Missing (mutation)",
+   "1,1"="P",
+   "0,0"="N")

```

```

> co5.errors <- apply(co5.pairs, 2, Vectorize(convert))
> co8.errors <- apply(co8.pairs, 2, Vectorize(convert))

> library(ggplot2)
> library(reshape2)
> order.nodes <- function(adjmat)
+ {
+   names <- c("Root")
+   stack <- NULL
+   while (TRUE)
+   {
+     stack <- c(colnames(adjmat)[which(adjmat[names[1],]!=0)], stack)
+     if (length(stack) == 0) break
+     names <- c(stack[1], names)
+     stack <- stack[-1]
+   }
+   return(names)
+ }
> trim.pos <- function(charvec) str_extract(charvec, "[A-Z0-9]*")
> error.mat <- co8.errors
> gt.mat <- co8.gm
> data.mat <- co8.dm
> adjmat <- co8.adjmat
> plot.error.mat <- function(error.mat, gt.mat, data.mat, adjmat, size=4)
+ {
+   # Add a hierarchical clustering sorting step before sorting by tree
+   mut.hclust.sorted <- colnames(data.mat)[hclust(dist(t(gt.mat)),method='ward.D')$order]
+   cell.hclust.sorted <- rownames(data.mat)[hclust(dist(gt.mat),method='ward.D')$order]
+   adjmat <- adjmat[c("Root",mut.hclust.sorted,cell.hclust.sorted),c("Root",mut.hclust.sorted)]
+   all.order <- order.nodes(adjmat)
+   mut.sorted <- unique(all.order[all.order %in% colnames(error.mat)])
+   cell.sorted <- unique(all.order[all.order %in% rownames(error.mat)])
+   #colnames(error.mat) <- make.unique(trim.pos(colnames(error.mat)))
+   #mut.sorted <- make.unique(trim.pos(mut.sorted))
+   y <- melt(cbind(data.frame(cell=rownames(error.mat)),error.mat), id.vars=c('cell'))
+   ggplot(y, aes(cell, variable)) + geom_tile(aes(fill=factor(value)),color='white',size=1)
+ }
> save.error.mat <- function(error.mat, gt.mat, data.mat, adjmat, filename)
+ {
+   # Add a hierarchical clustering sorting step before sorting by tree
+   mut.hclust.sorted <- colnames(data.mat)[hclust(dist(t(gt.mat)),method='ward.D')$order]
+   cell.hclust.sorted <- rownames(data.mat)[hclust(dist(gt.mat),method='ward.D')$order]
+   adjmat <- adjmat[c("Root",mut.hclust.sorted,cell.hclust.sorted),c("Root",mut.hclust.sorted)]
+   all.order <- order.nodes(adjmat)
+   mut.sorted <- unique(all.order[all.order %in% colnames(error.mat)])
+   cell.sorted <- unique(all.order[all.order %in% rownames(error.mat)])

```



```
+ # Apply the sorting to the matrix
+ sorted.error.mat <- error.mat[cell.sorted,mut.sorted]
+ # Write the matrix to a file
+ write.table(sorted.error.mat, filename, quote=FALSE, sep='\t')
+ }
```

```
> plot.error.mat(co5.errors, co5.gm, co5.dm, co5.adjmat, size=7)
```

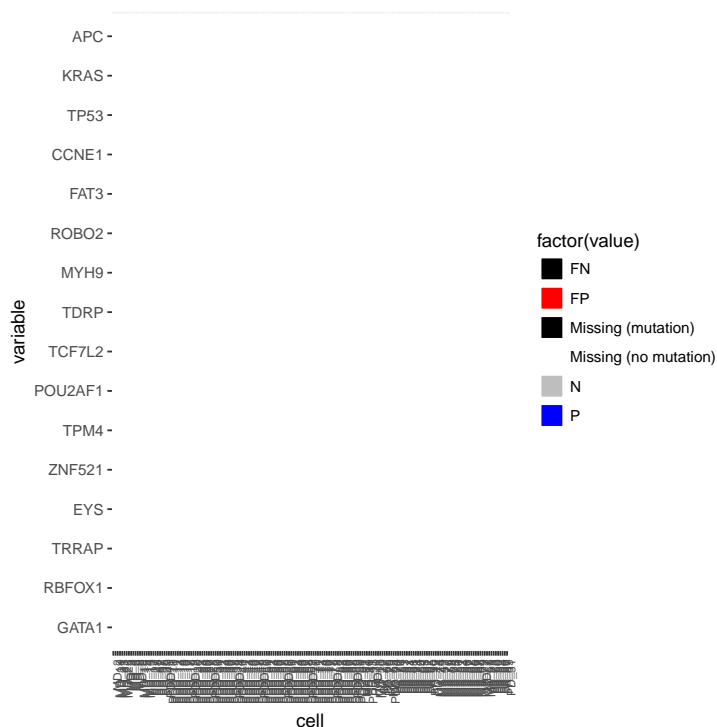

```
> png("co5_error_mat.png", width=1514, height=1056)
> plot.error.mat(co5.errors, co5.gm, co5.dm, co5.adjmat, size=7)
> dev.off()
```

```
null device
      1
```

```
> pdf("co5_error_mat.pdf", width=50, height=30)
> plot.error.mat(co5.errors, co5.gm, co5.dm, co5.adjmat, size=7)
> dev.off()
```

```
null device
      1
```

```
> save.error.mat(co5.errors, co5.gm, co5.dm, co5.adjmat, "co5_error_mat.txt")
```

```
> plot.error.mat(co8.errors, co8.gm, co8.dm, co8.adjmat, size=8)
```

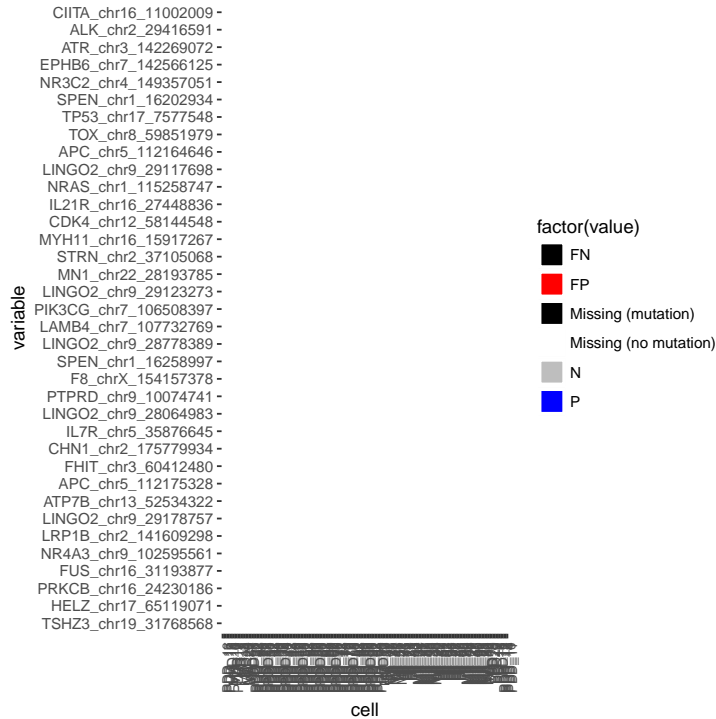

```
> png("co8_error_mat.png", width=1165, height=660)
```

```
> plot.error.mat(co8.errors, co8.gm, co8.dm, co8.adjmat, size=8)
```

```
> dev.off()
```

```
null device
```

```
1
```

```
> pdf("co8_error_mat.pdf", width=50, height=30)
```

```
> plot.error.mat(co8.errors, co8.gm, co8.dm, co8.adjmat,size=8)
```

```
> dev.off()
```

```
null device
```

```
1
```

```
> save.error.mat(co8.errors, co8.gm, co8.dm, co8.adjmat, "co8_error_mat.txt")
```

## 6 Estimates of error rates

### 6.1 False negative rate

Here, I am defining false negative rate as the fraction of mutations that were called as non-mutated. I am *not* including missing sites.

### 6.1.1 CO5

```
> sum(co5.errors=="FN")/  
+ sum(co5.gm==1)  
  
[1] 0.07894737
```

### 6.1.2 CO8

```
> sum(co8.errors=="FN")/  
+ sum(co8.gm==1)  
  
[1] 0.12566
```

## 6.2 Rate of mutation not seen

Here, I consider cases where the mutation was not observed, which includes both sites called as negative, *and* missing values where a mutatio would be theoretically expected.

### 6.2.1 CO5

```
> (sum(co5.errors=='FN') + sum(co5.errors=='Missing (mutation)')) /  
+ sum(co5.gm==1)  
  
[1] 0.1505848
```

### 6.2.2 CO8

```
> (sum(co8.errors=='FN') + sum(co8.errors=='Missing (mutation)')) /  
+ sum(co8.gm==1)  
  
[1] 0.189018
```

## 6.3 False positive rate

Here, I consider mutations called as positive, where no mutation is actually present.

### 6.3.1 CO5

```
> sum(co5.errors=='FP')/  
+ sum(co5.gm==0)  
  
[1] 0.01524954
```

### 6.3.2 CO8

```
> sum(co8.errors=='FP')/  
+ sum(co8.gm==0)
```

```
[1] 0.01748439
```

## 6.4 False discovery rate

Here, I consider the fraction of positive mutation calls which are false.

### 6.4.1 CO5

```
> (sum(co5.errors=='FP')+sum(co5.errors=='P'))
```

```
[1] 614
```

```
> sum(co5.errors=='FP')/  
+ sum(co5.dm==1)
```

```
[1] 0.05374593
```

### 6.4.2 CO8

```
> sum(co8.errors=='FP')/  
+ sum(co8.dm==1)
```

```
[1] 0.113164
```
