# Supplementary figures and images for: Single-cell DNA sequencing reveals a late-dissemination model in metastatic colorectal cancer
Source: HighWire-hosted journal article supplement (doi:10.1101/gr.209973.116), 2017-05-25

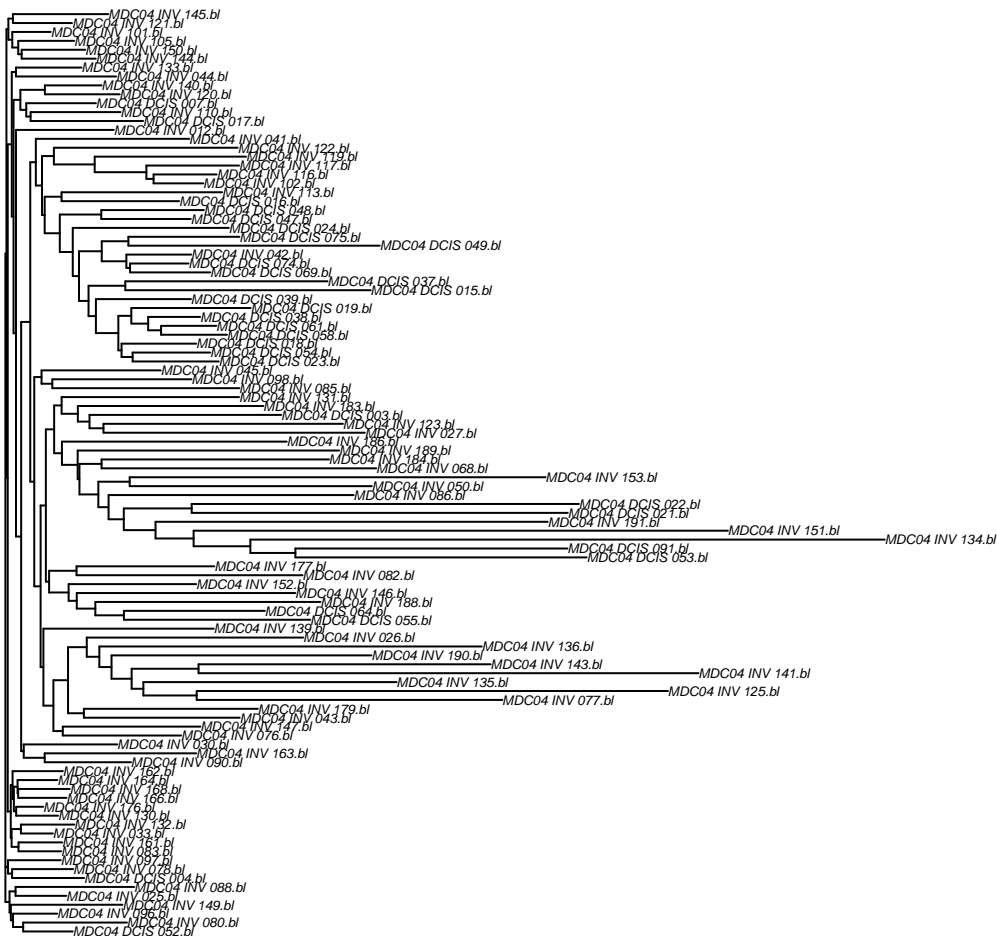

Supplement: Supplemental__Scripts.zip [file MDC04.tree.pdf › Supplemental__Scripts/cn_pipeline/trees/MDC04.tree.pdf]
